# Supplementary material for: Asymmetric Total Synthesis of Ieodomycin B
Source: Mar Drugs. 2017 Jan 18;15(1):17. doi: 10.3390/md15010017 (PMC5295237; doi:10.3390/md15010017)
Supplement: Supplementary file 1 [file marinedrugs-15-00017-s001.docx]

Supplementary Materials: Asymmetric Total Synthesis of Ieodomycin B

Shuangjie Lin, Jianting Zhang, Zhibin Zhang, Tianxiang Xu, Shuangping Huang and
Xiaoji Wang


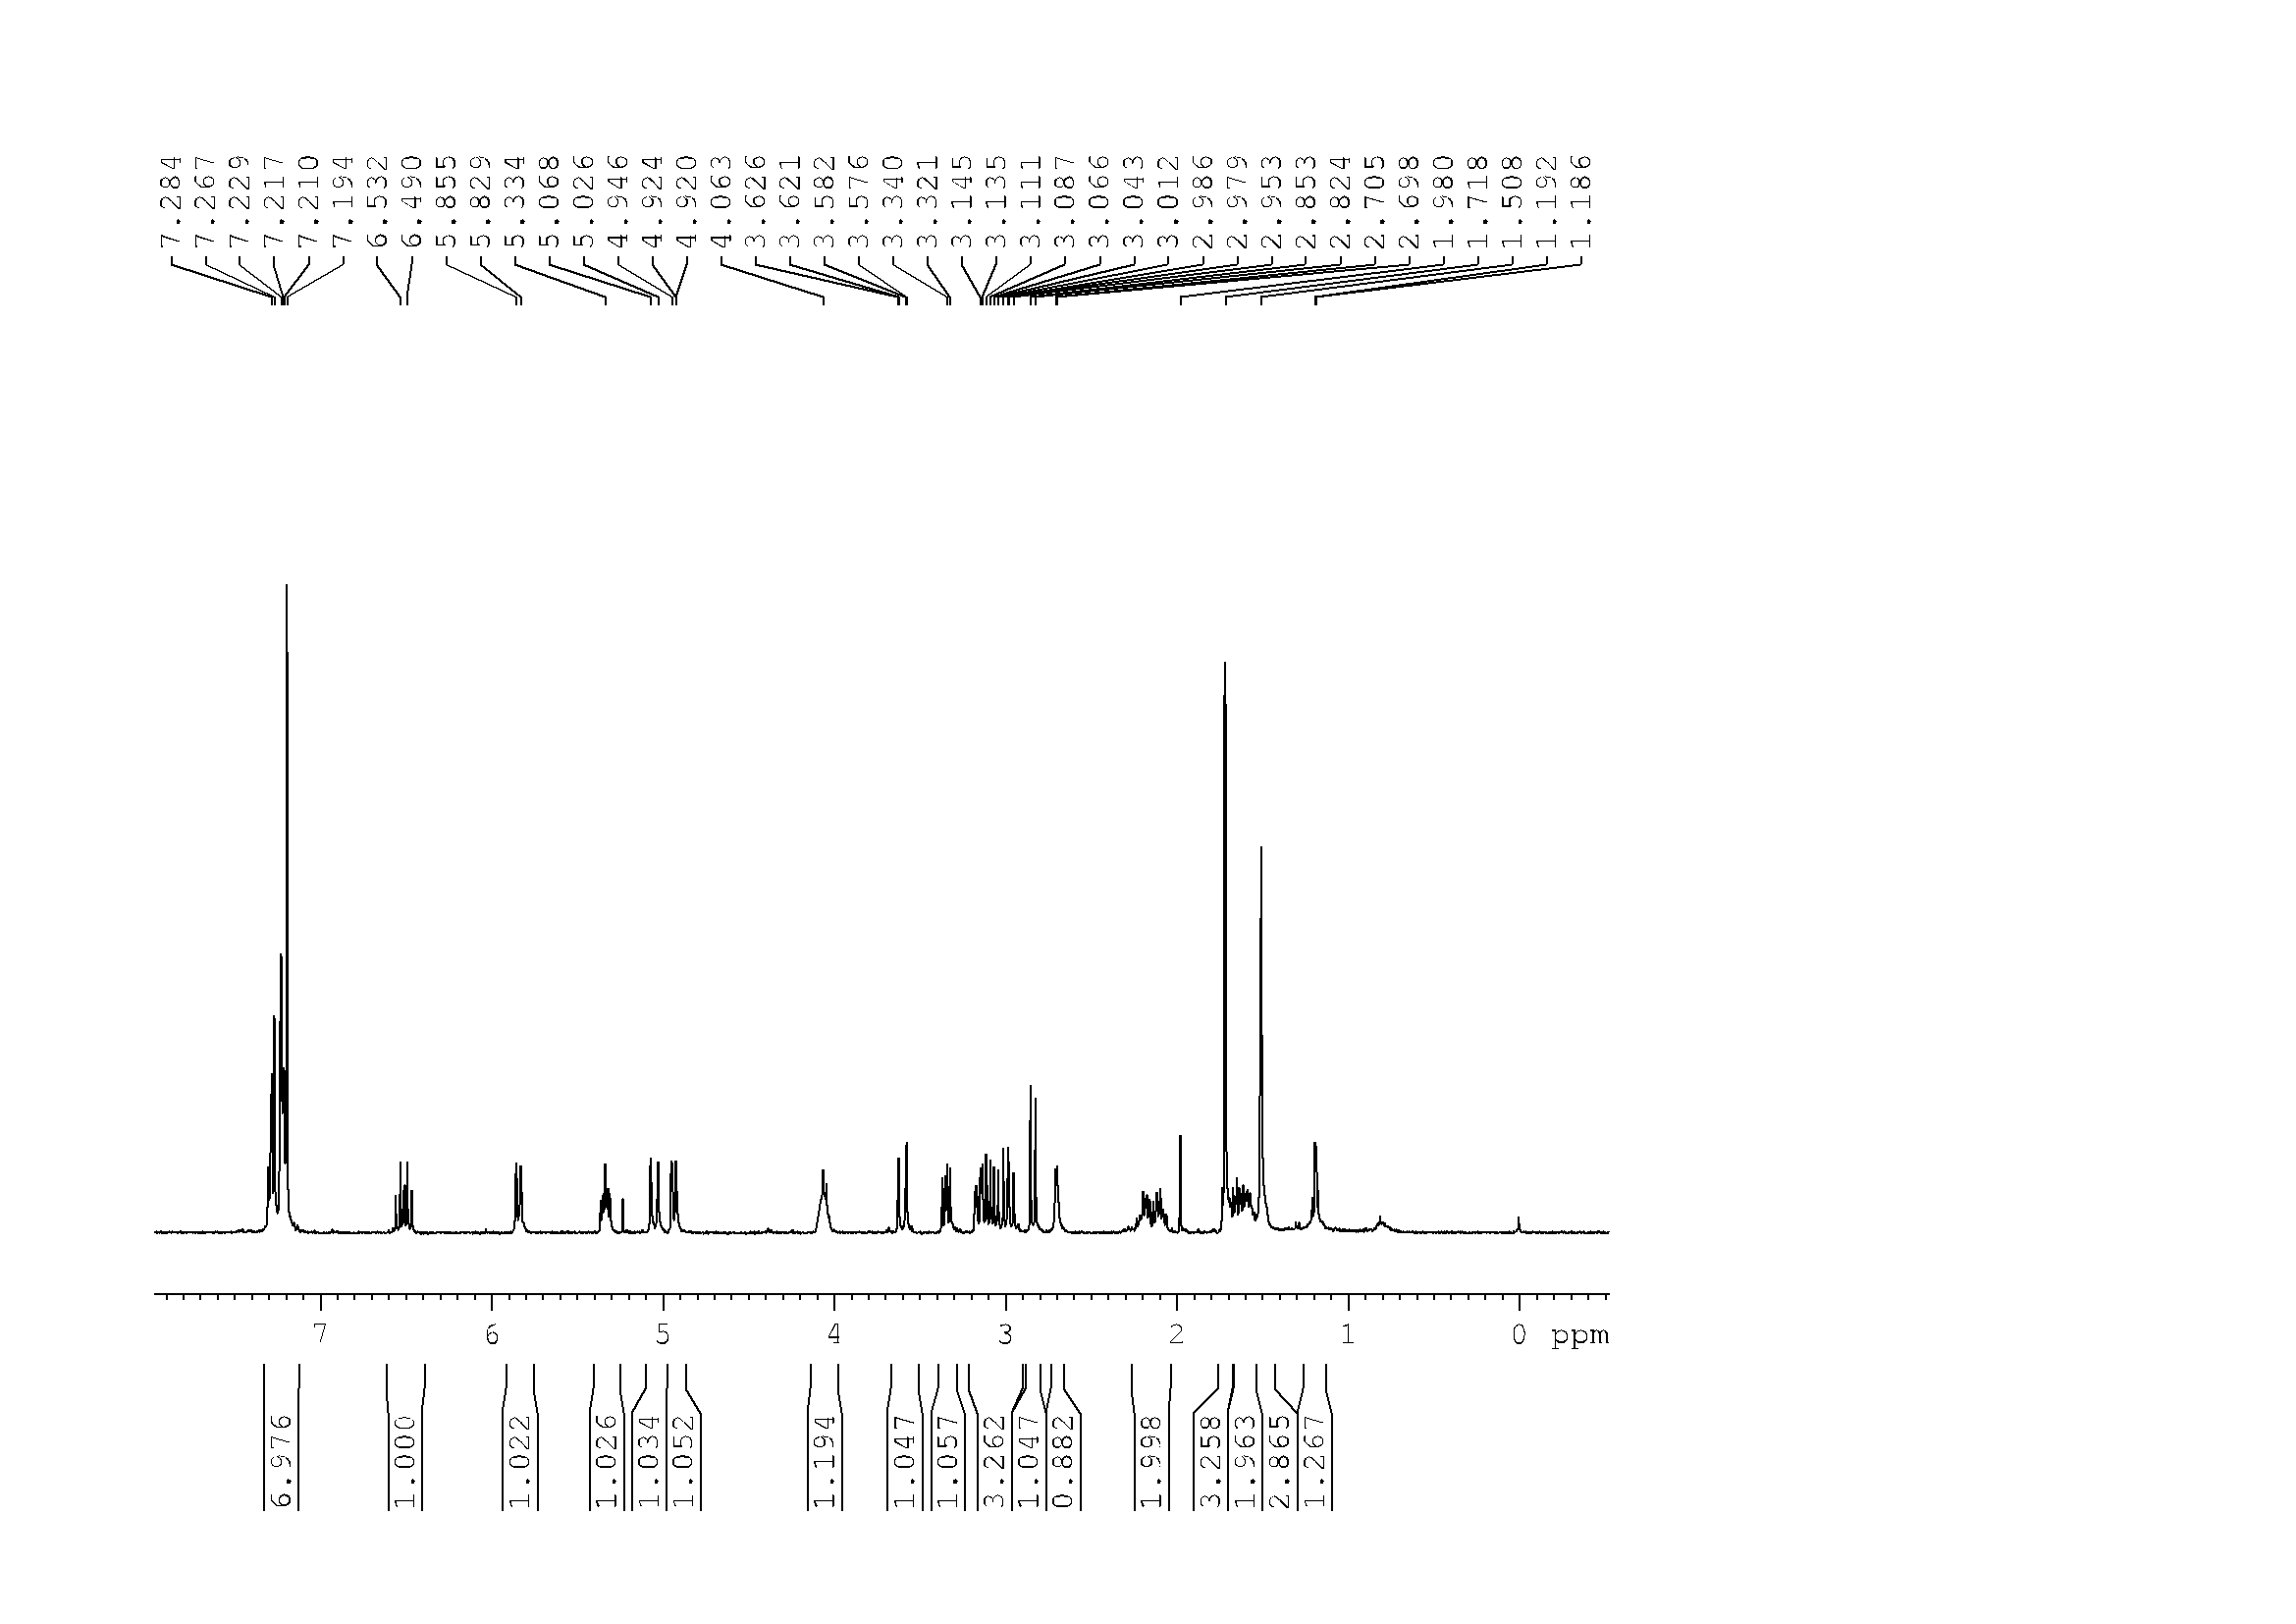


**Figure S1.** 1H NMR spectra ofCompound **4**.


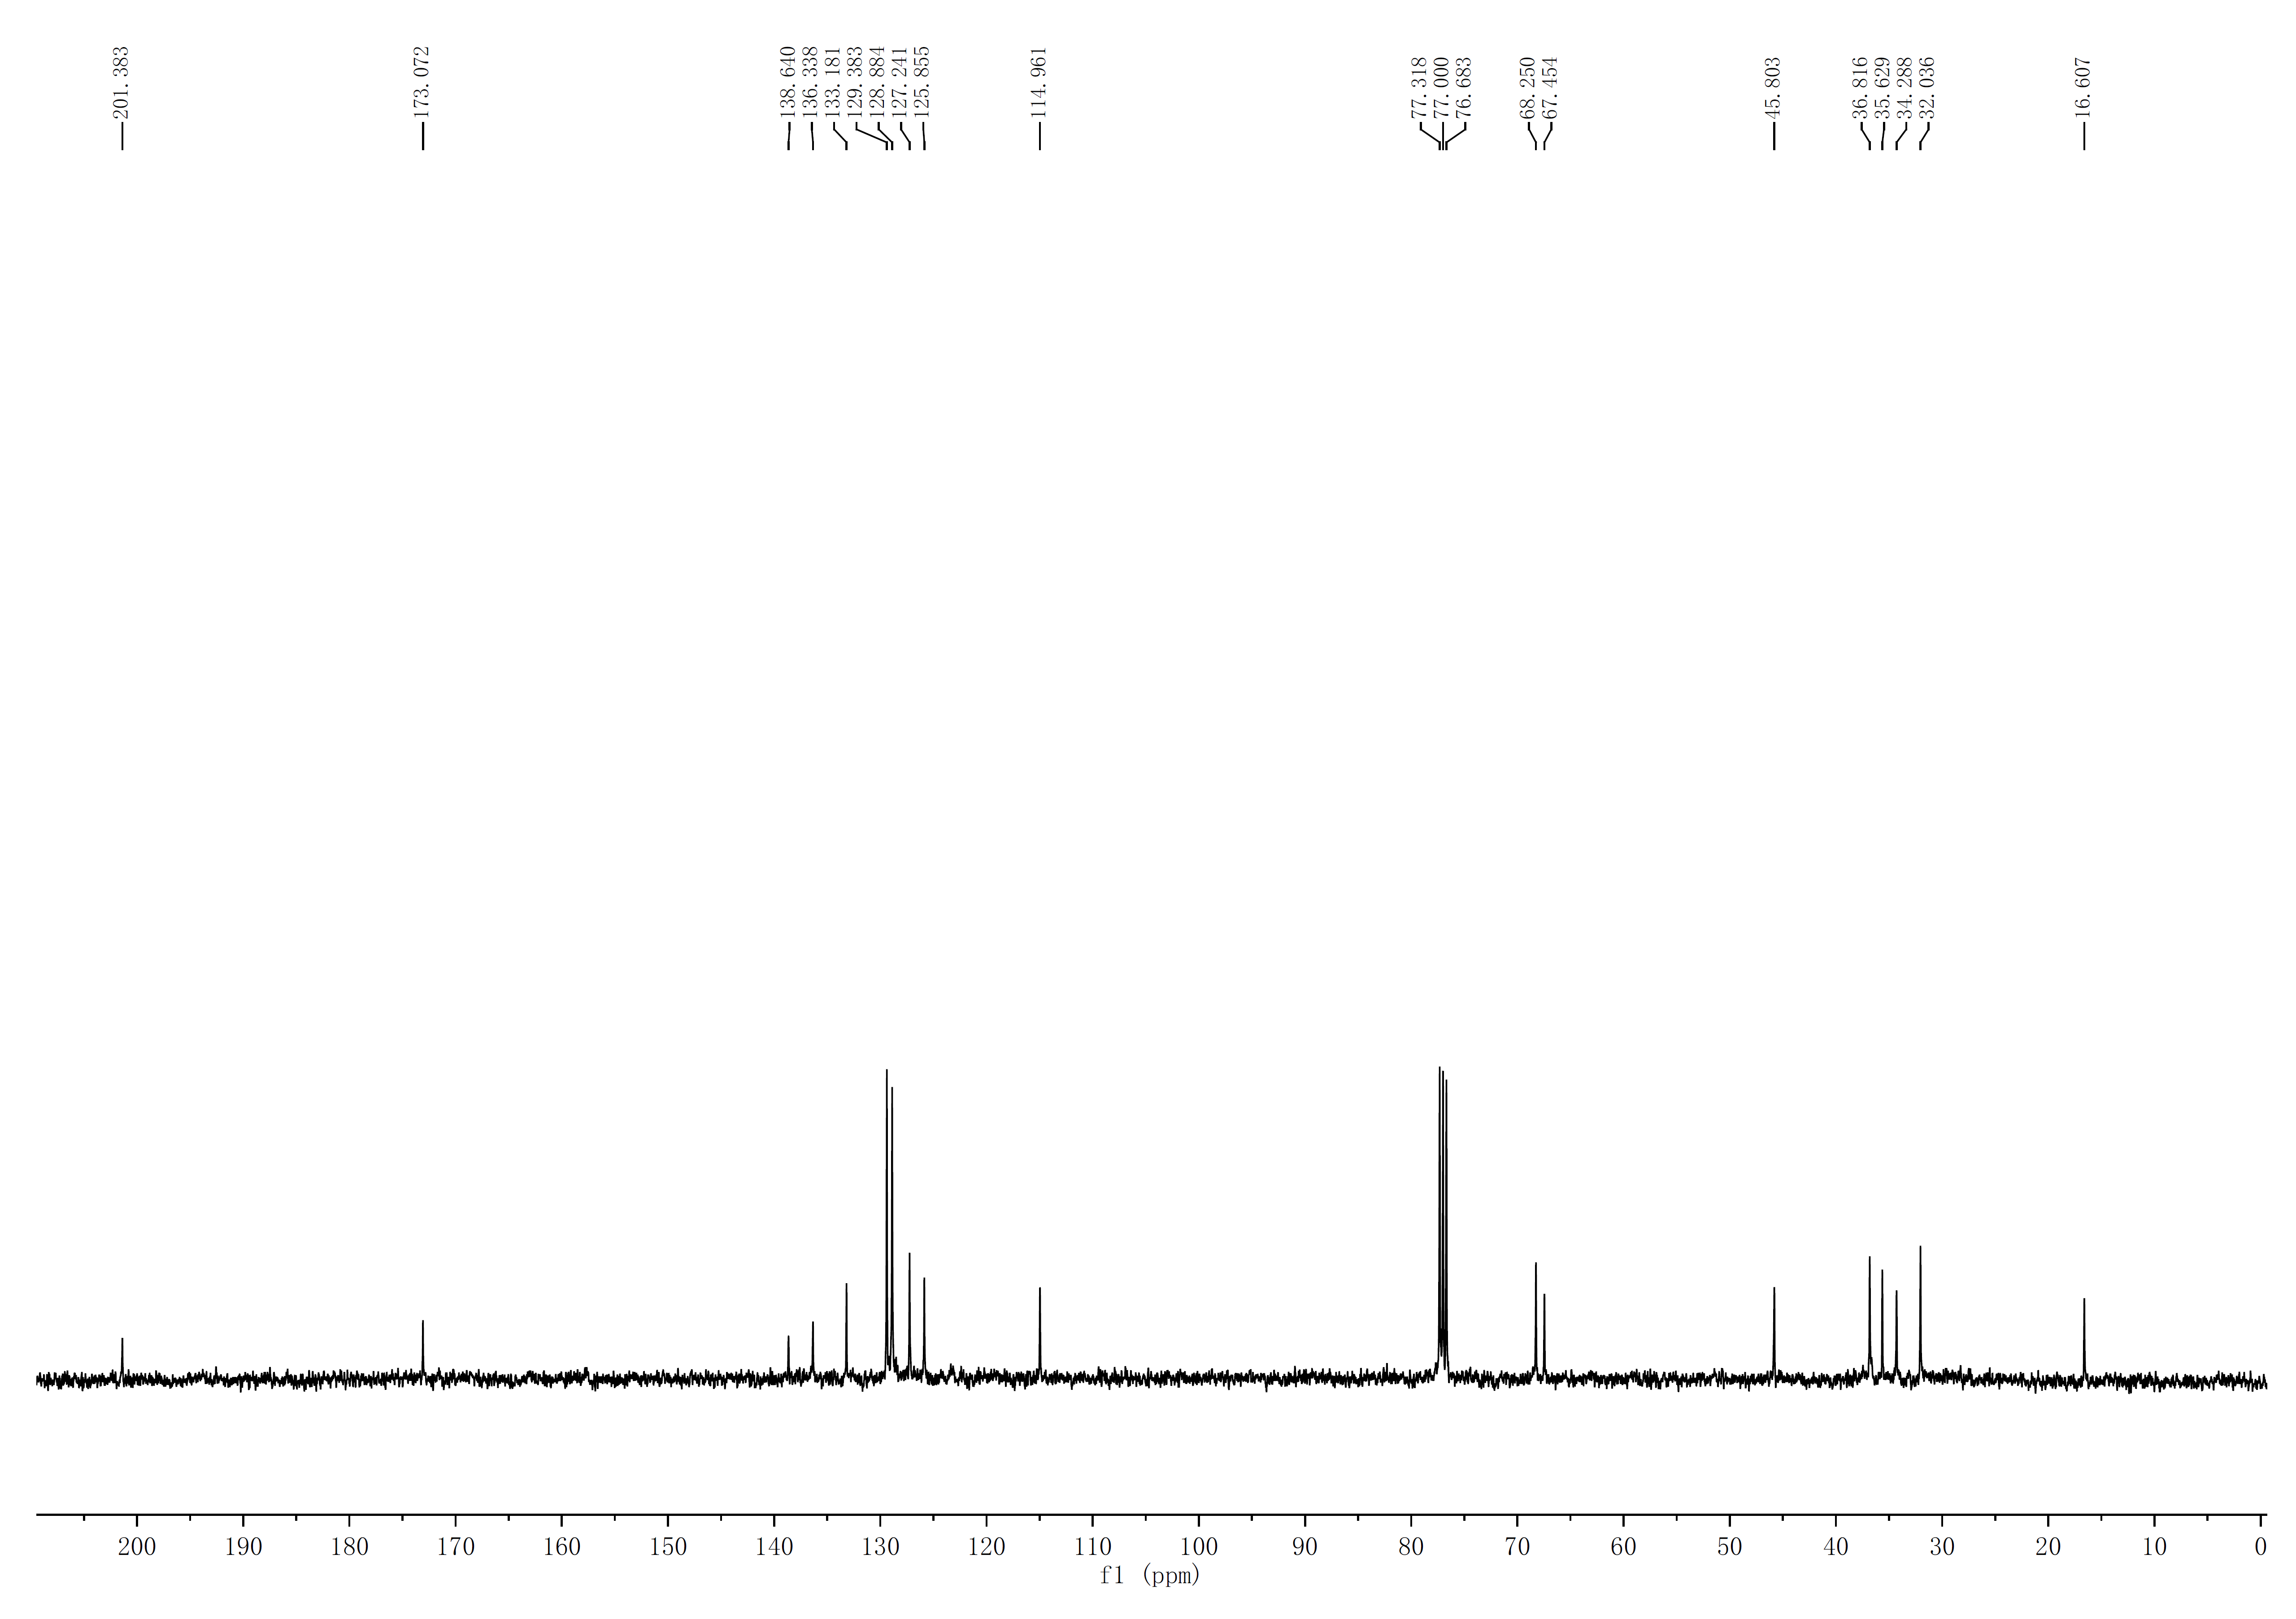


**Figure S2.** 13C NMR spectra ofCompound **4**.

**
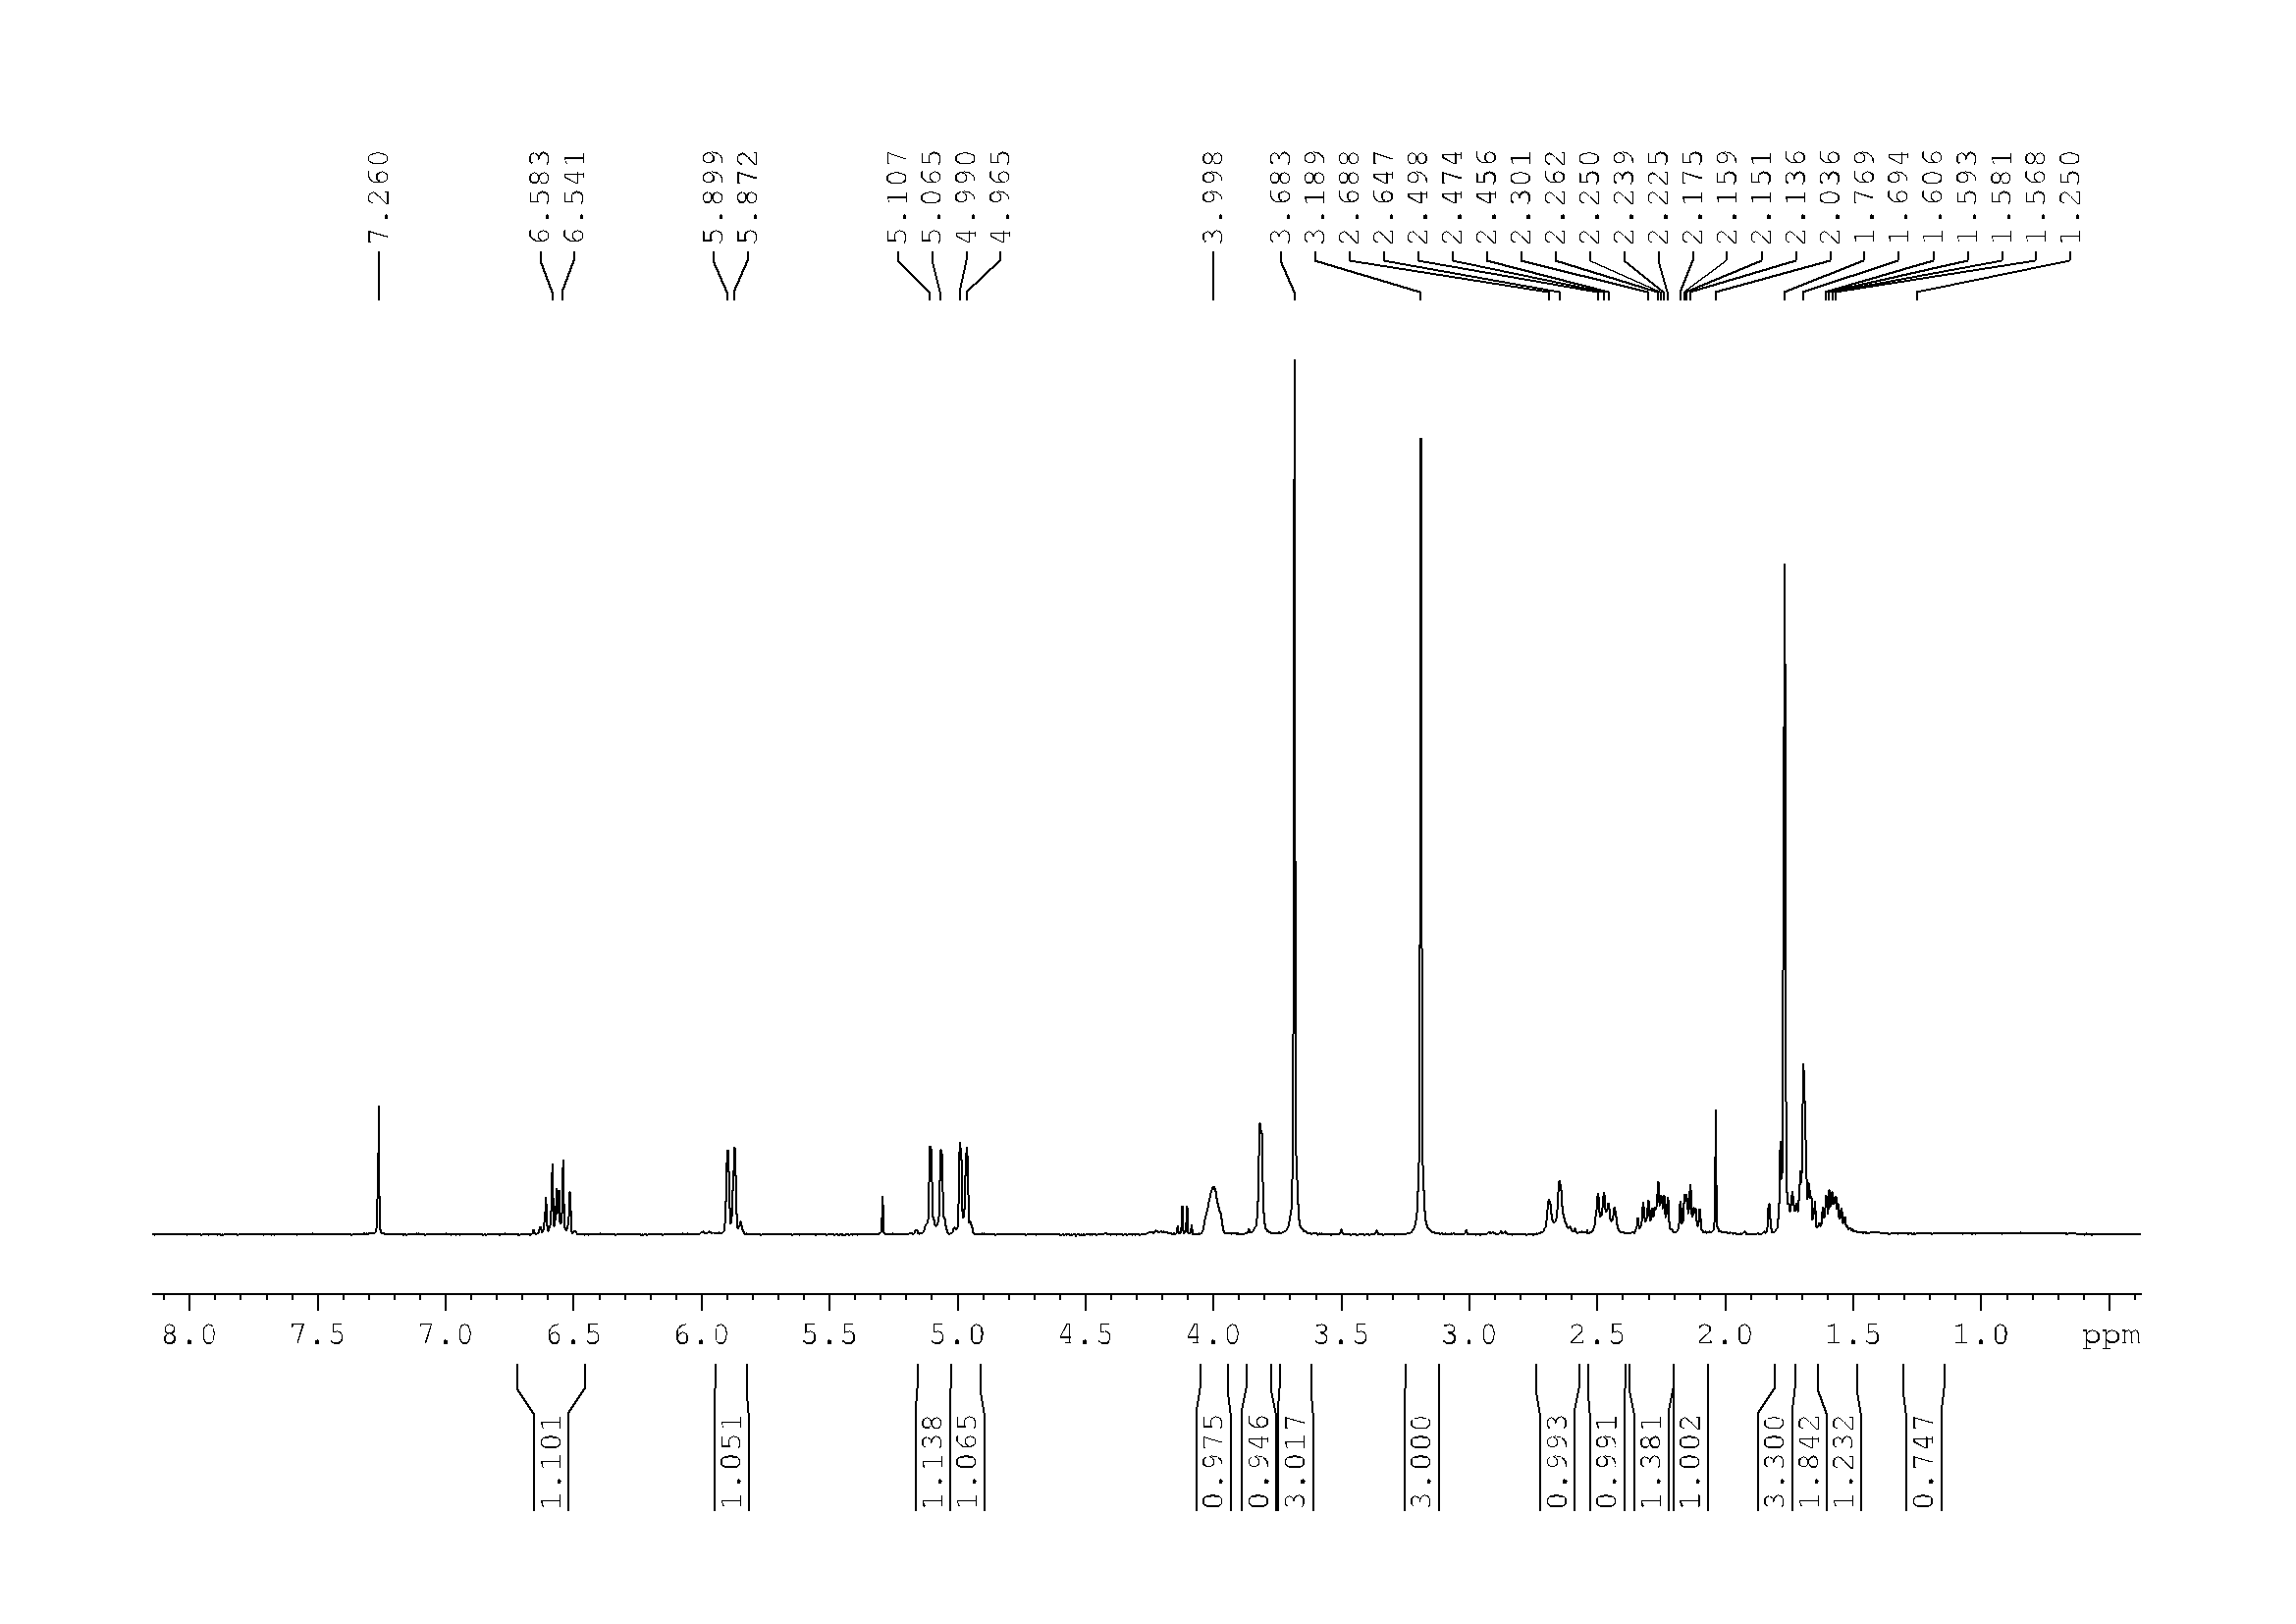
**

**Figure S3.** 1H NMR spectra ofCompound **11**.


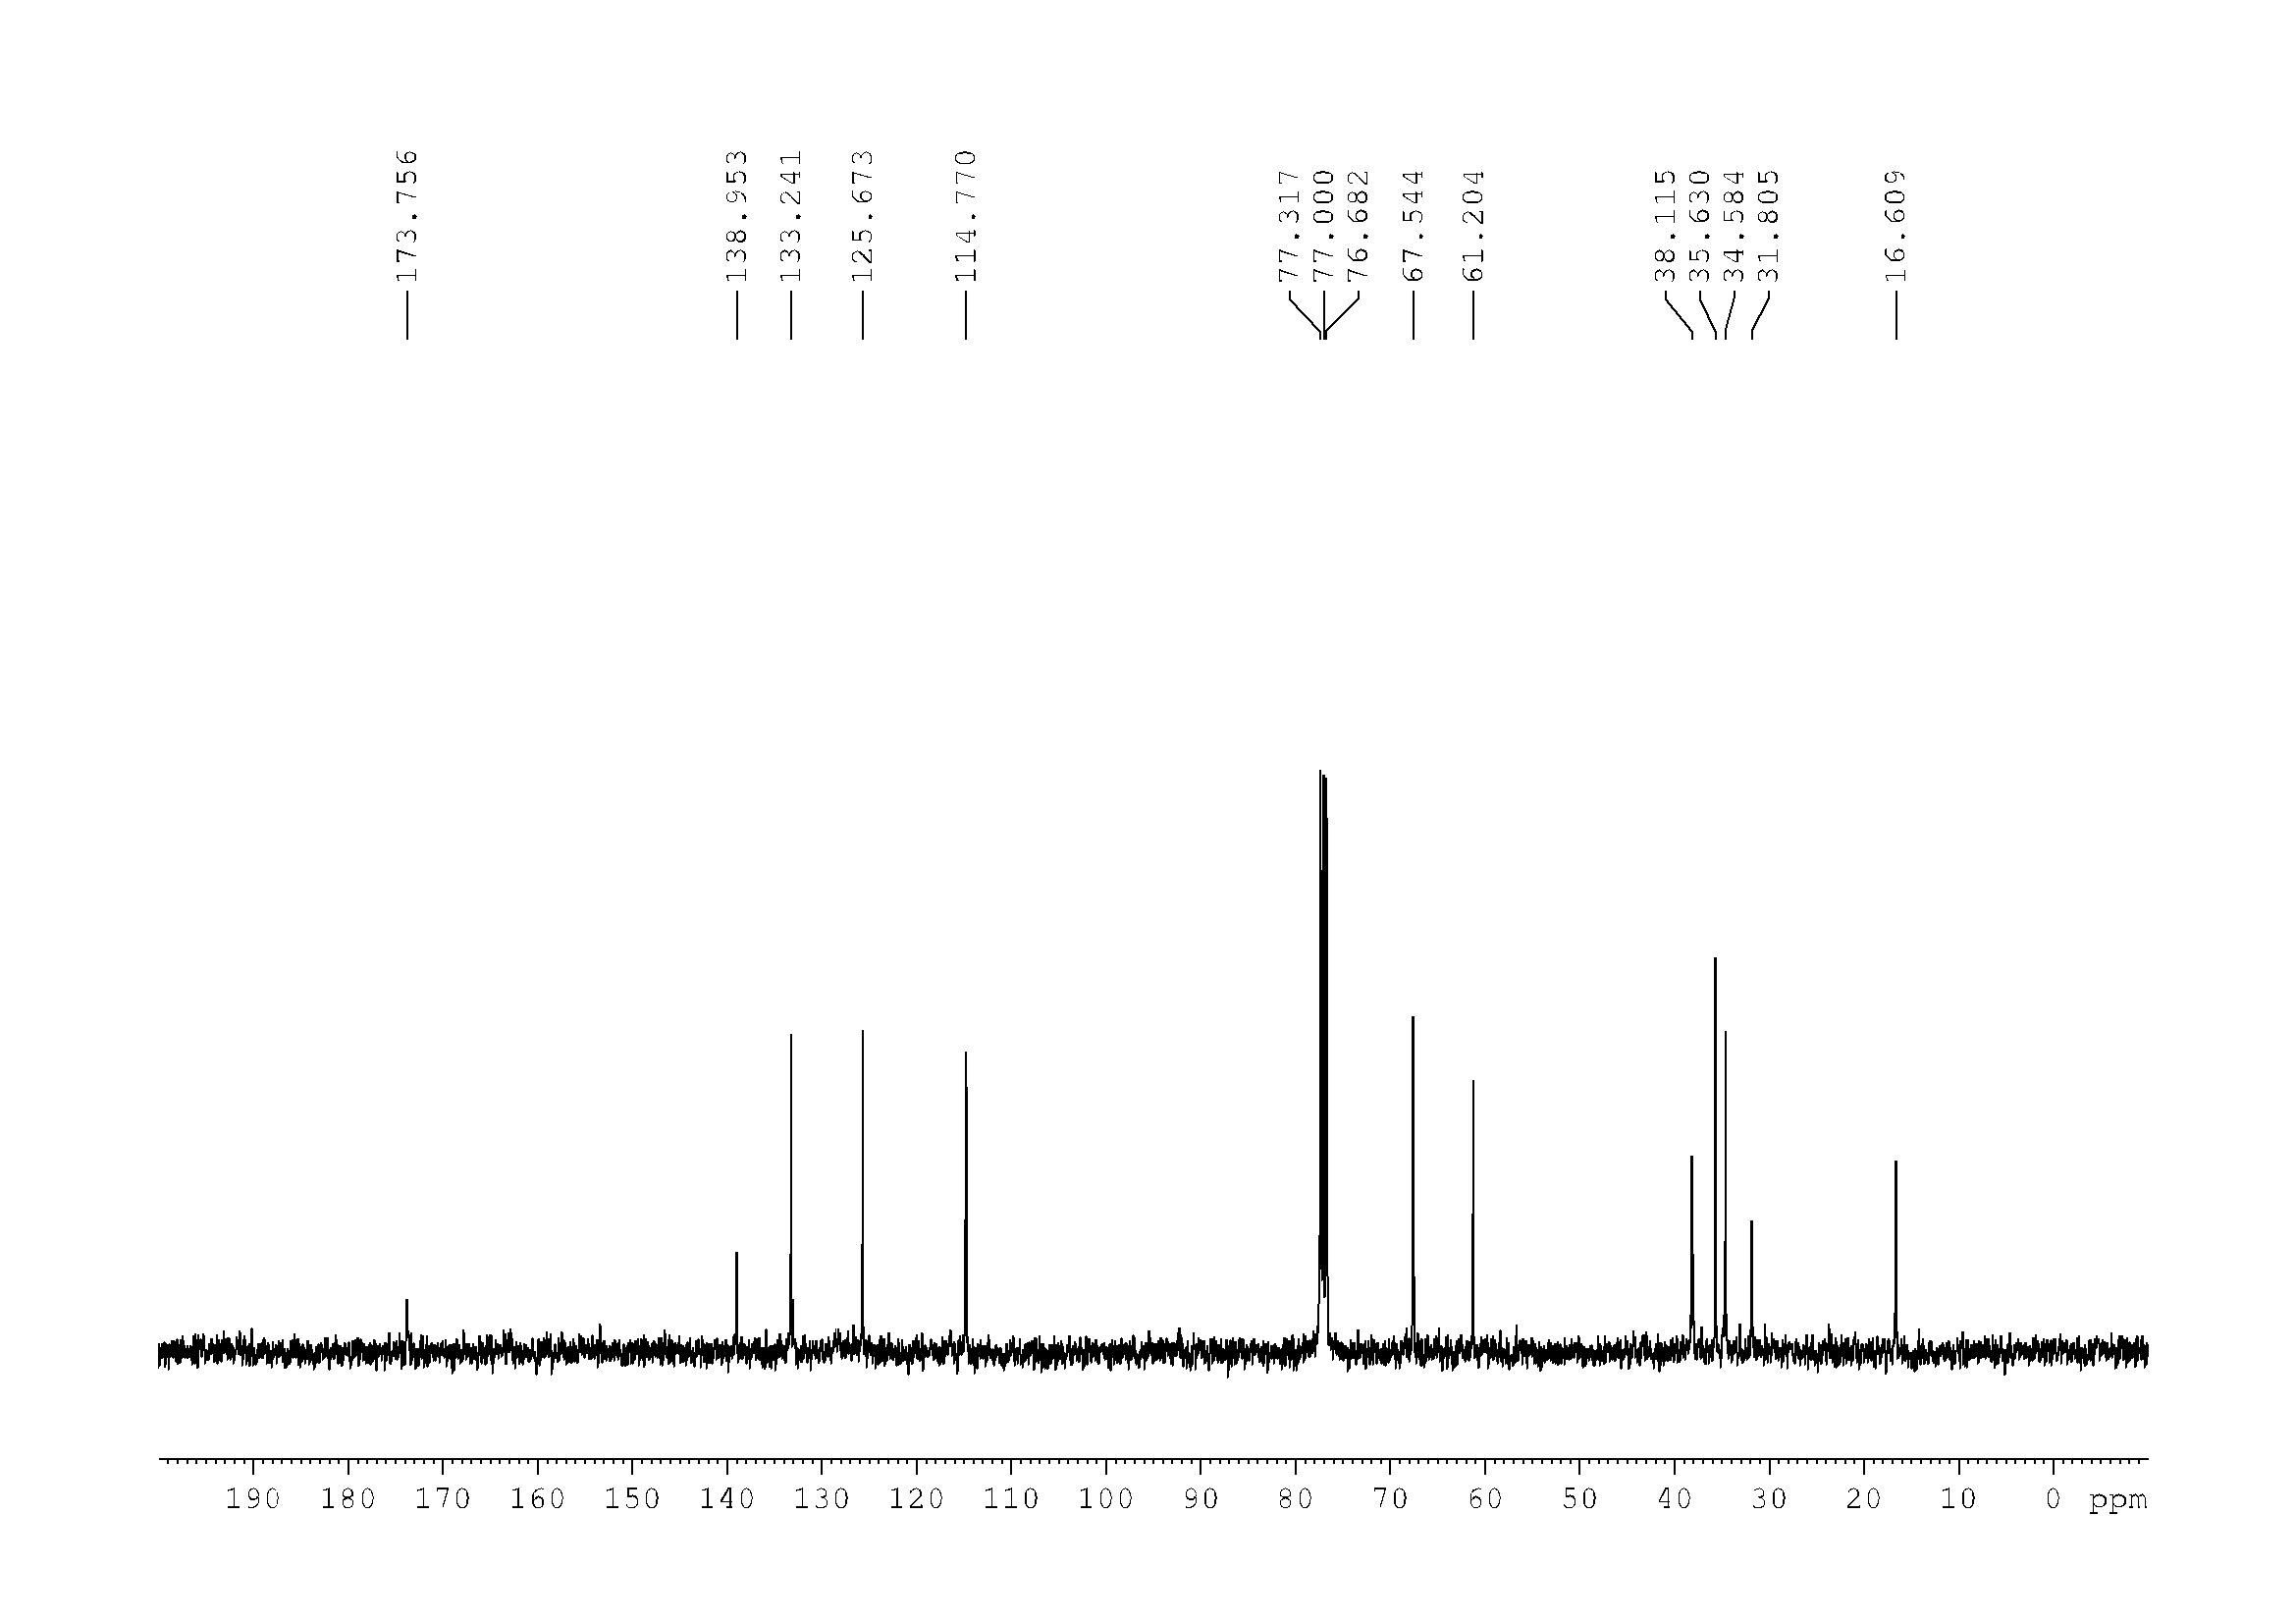


**Figure S4.** 13C NMR spectra ofCompound **11**.


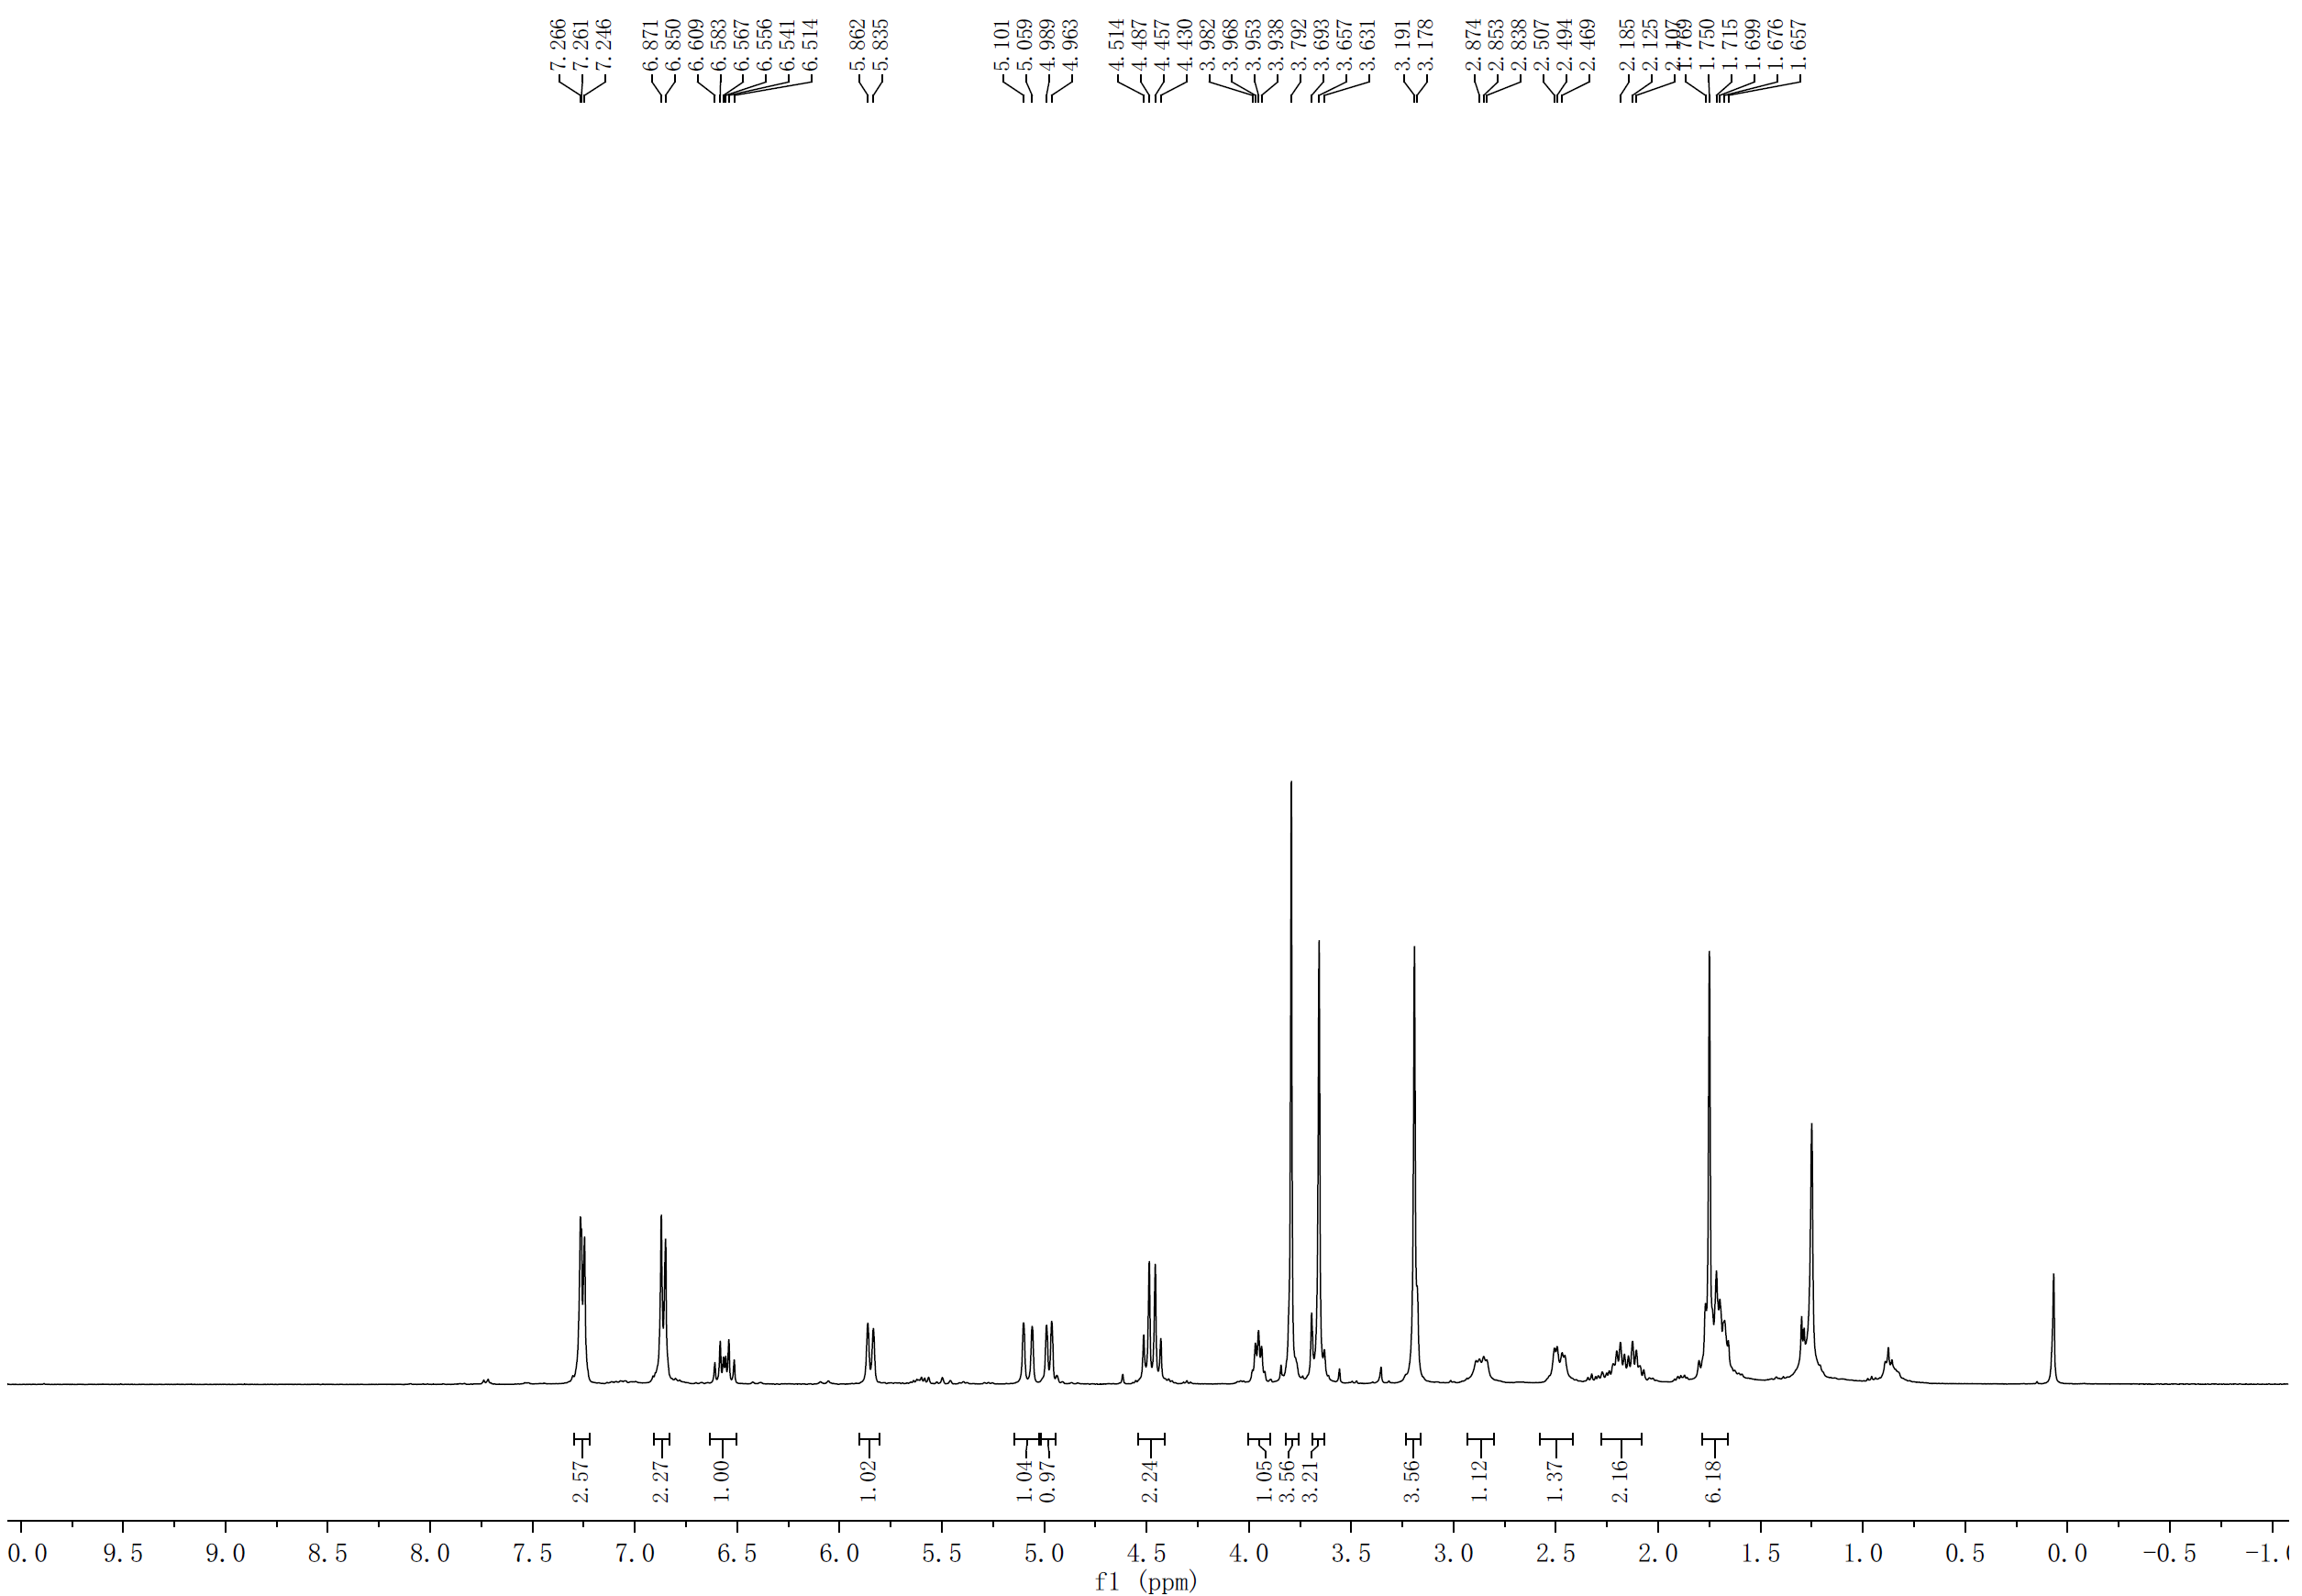


**Figure S5.** 1H NMR spectra ofCompound **12**.


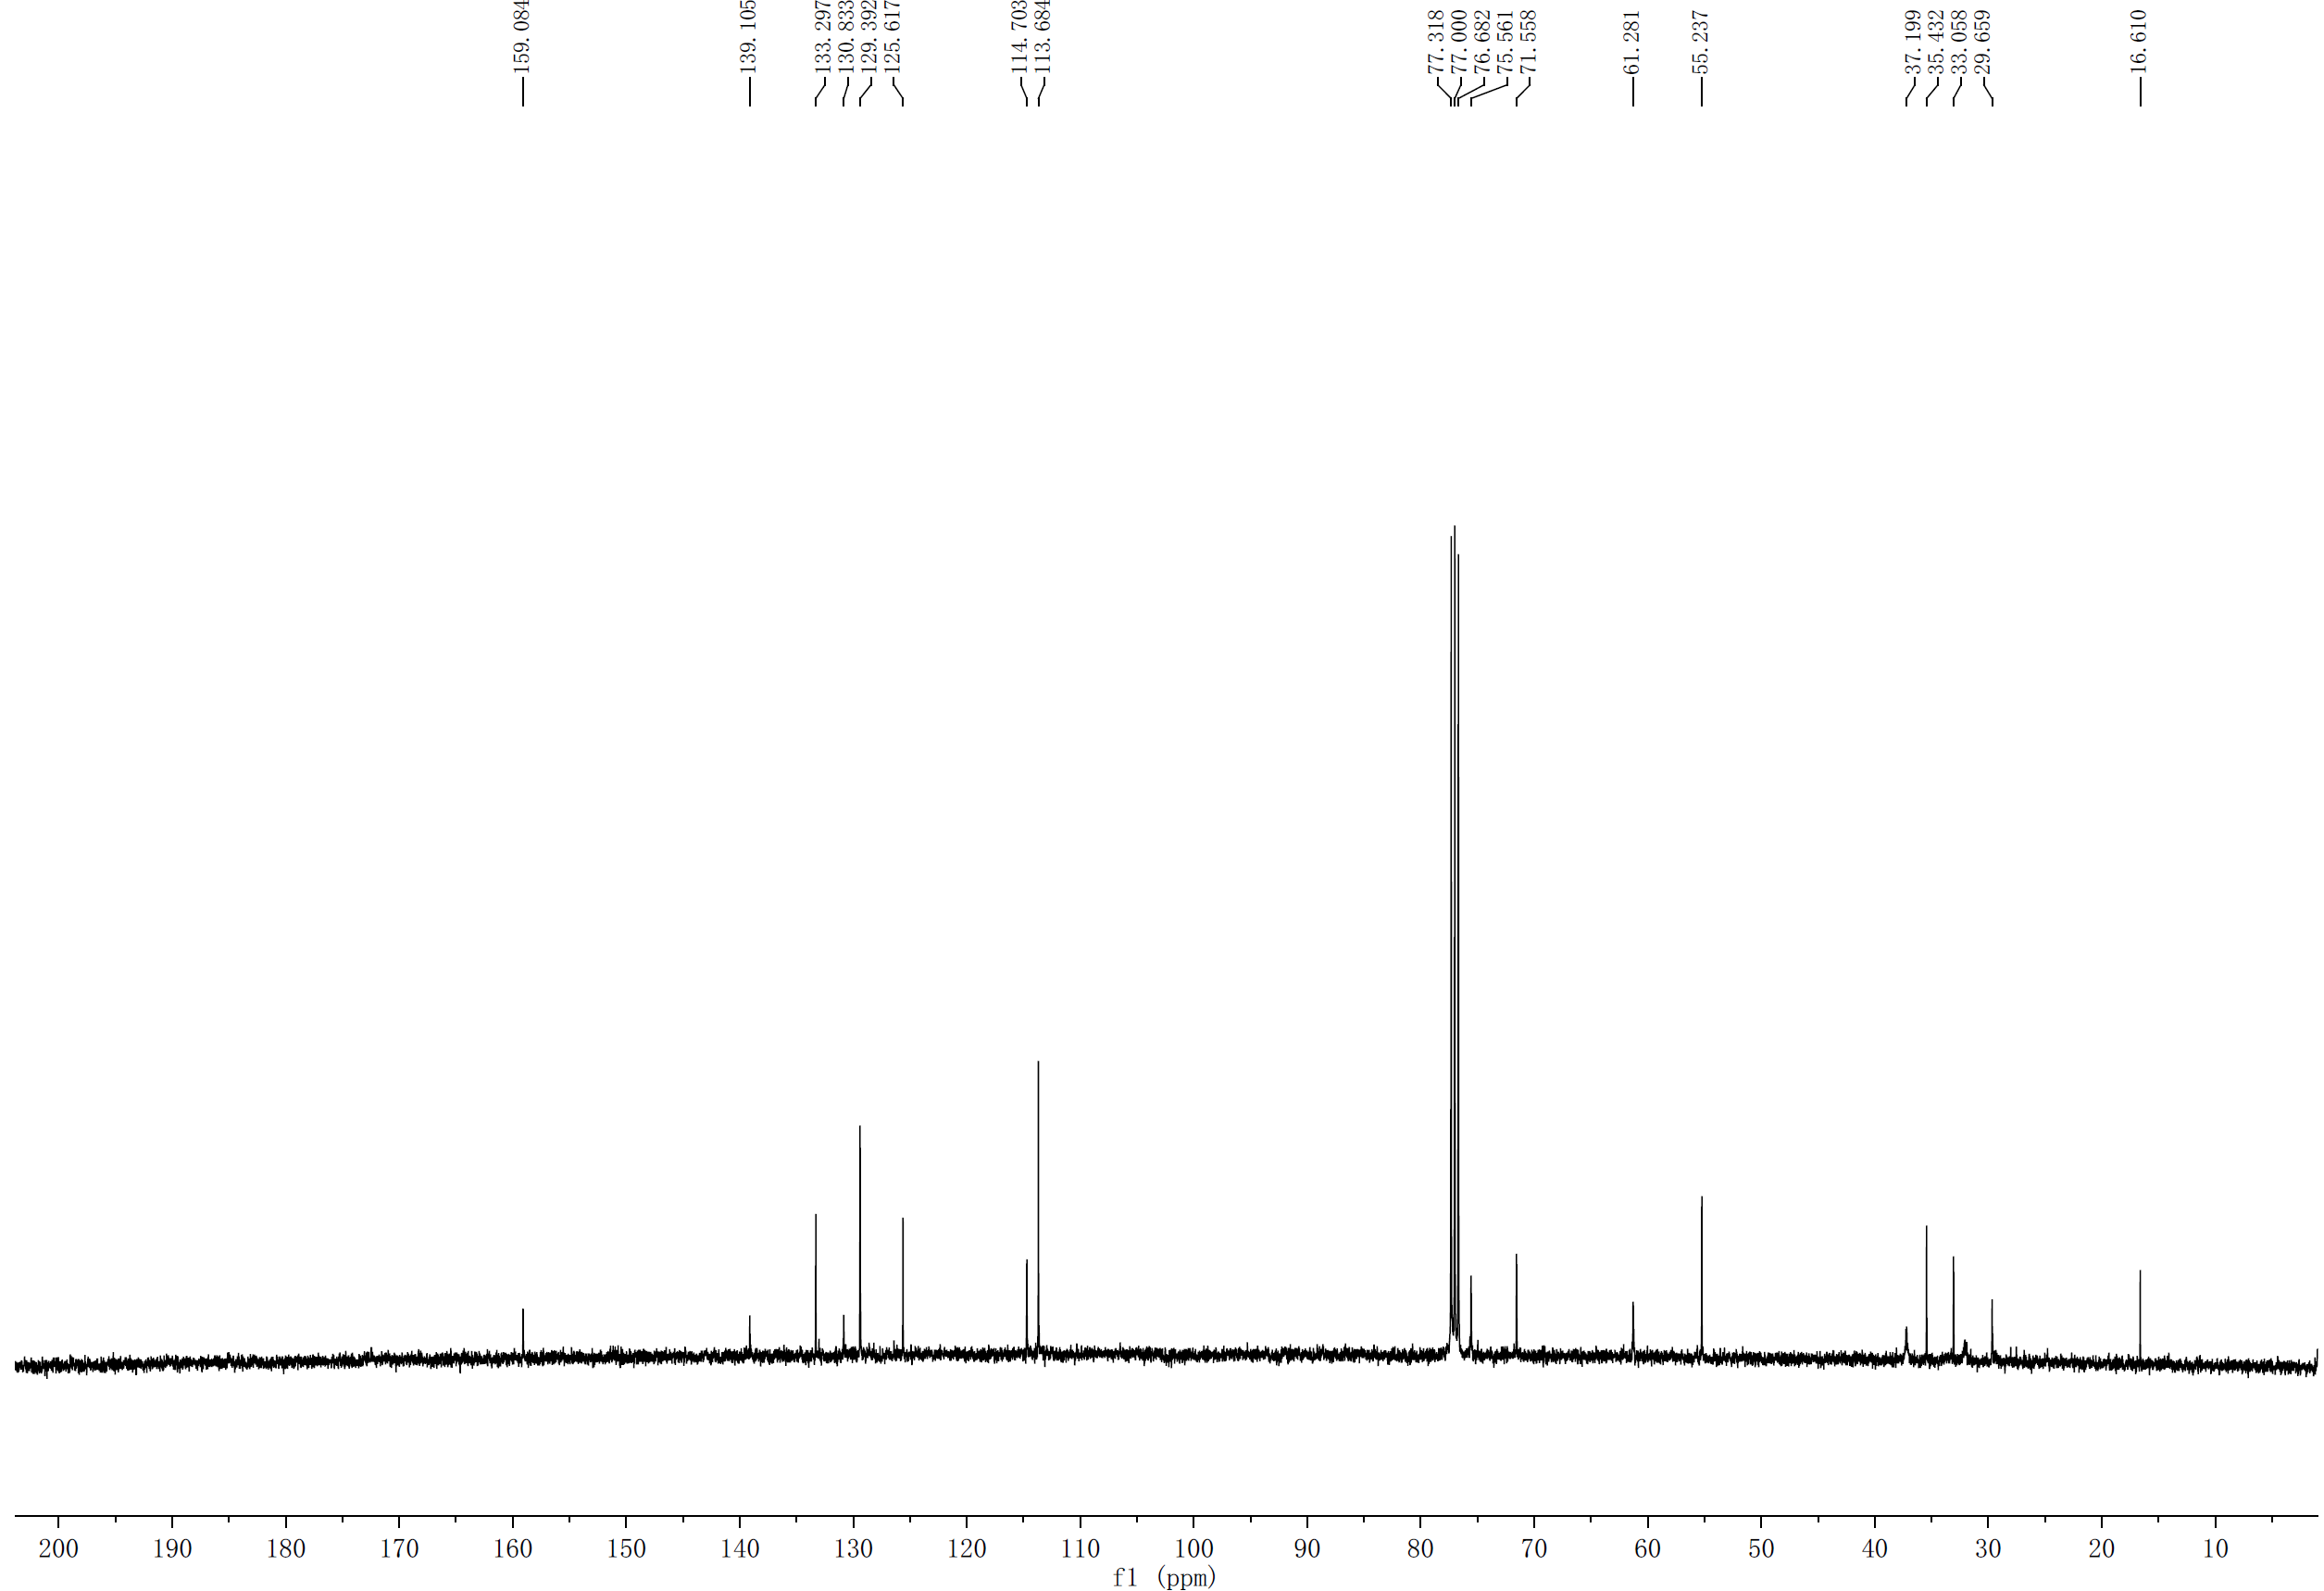


**Figure S6.** 13C NMR spectra ofCompound **12**.


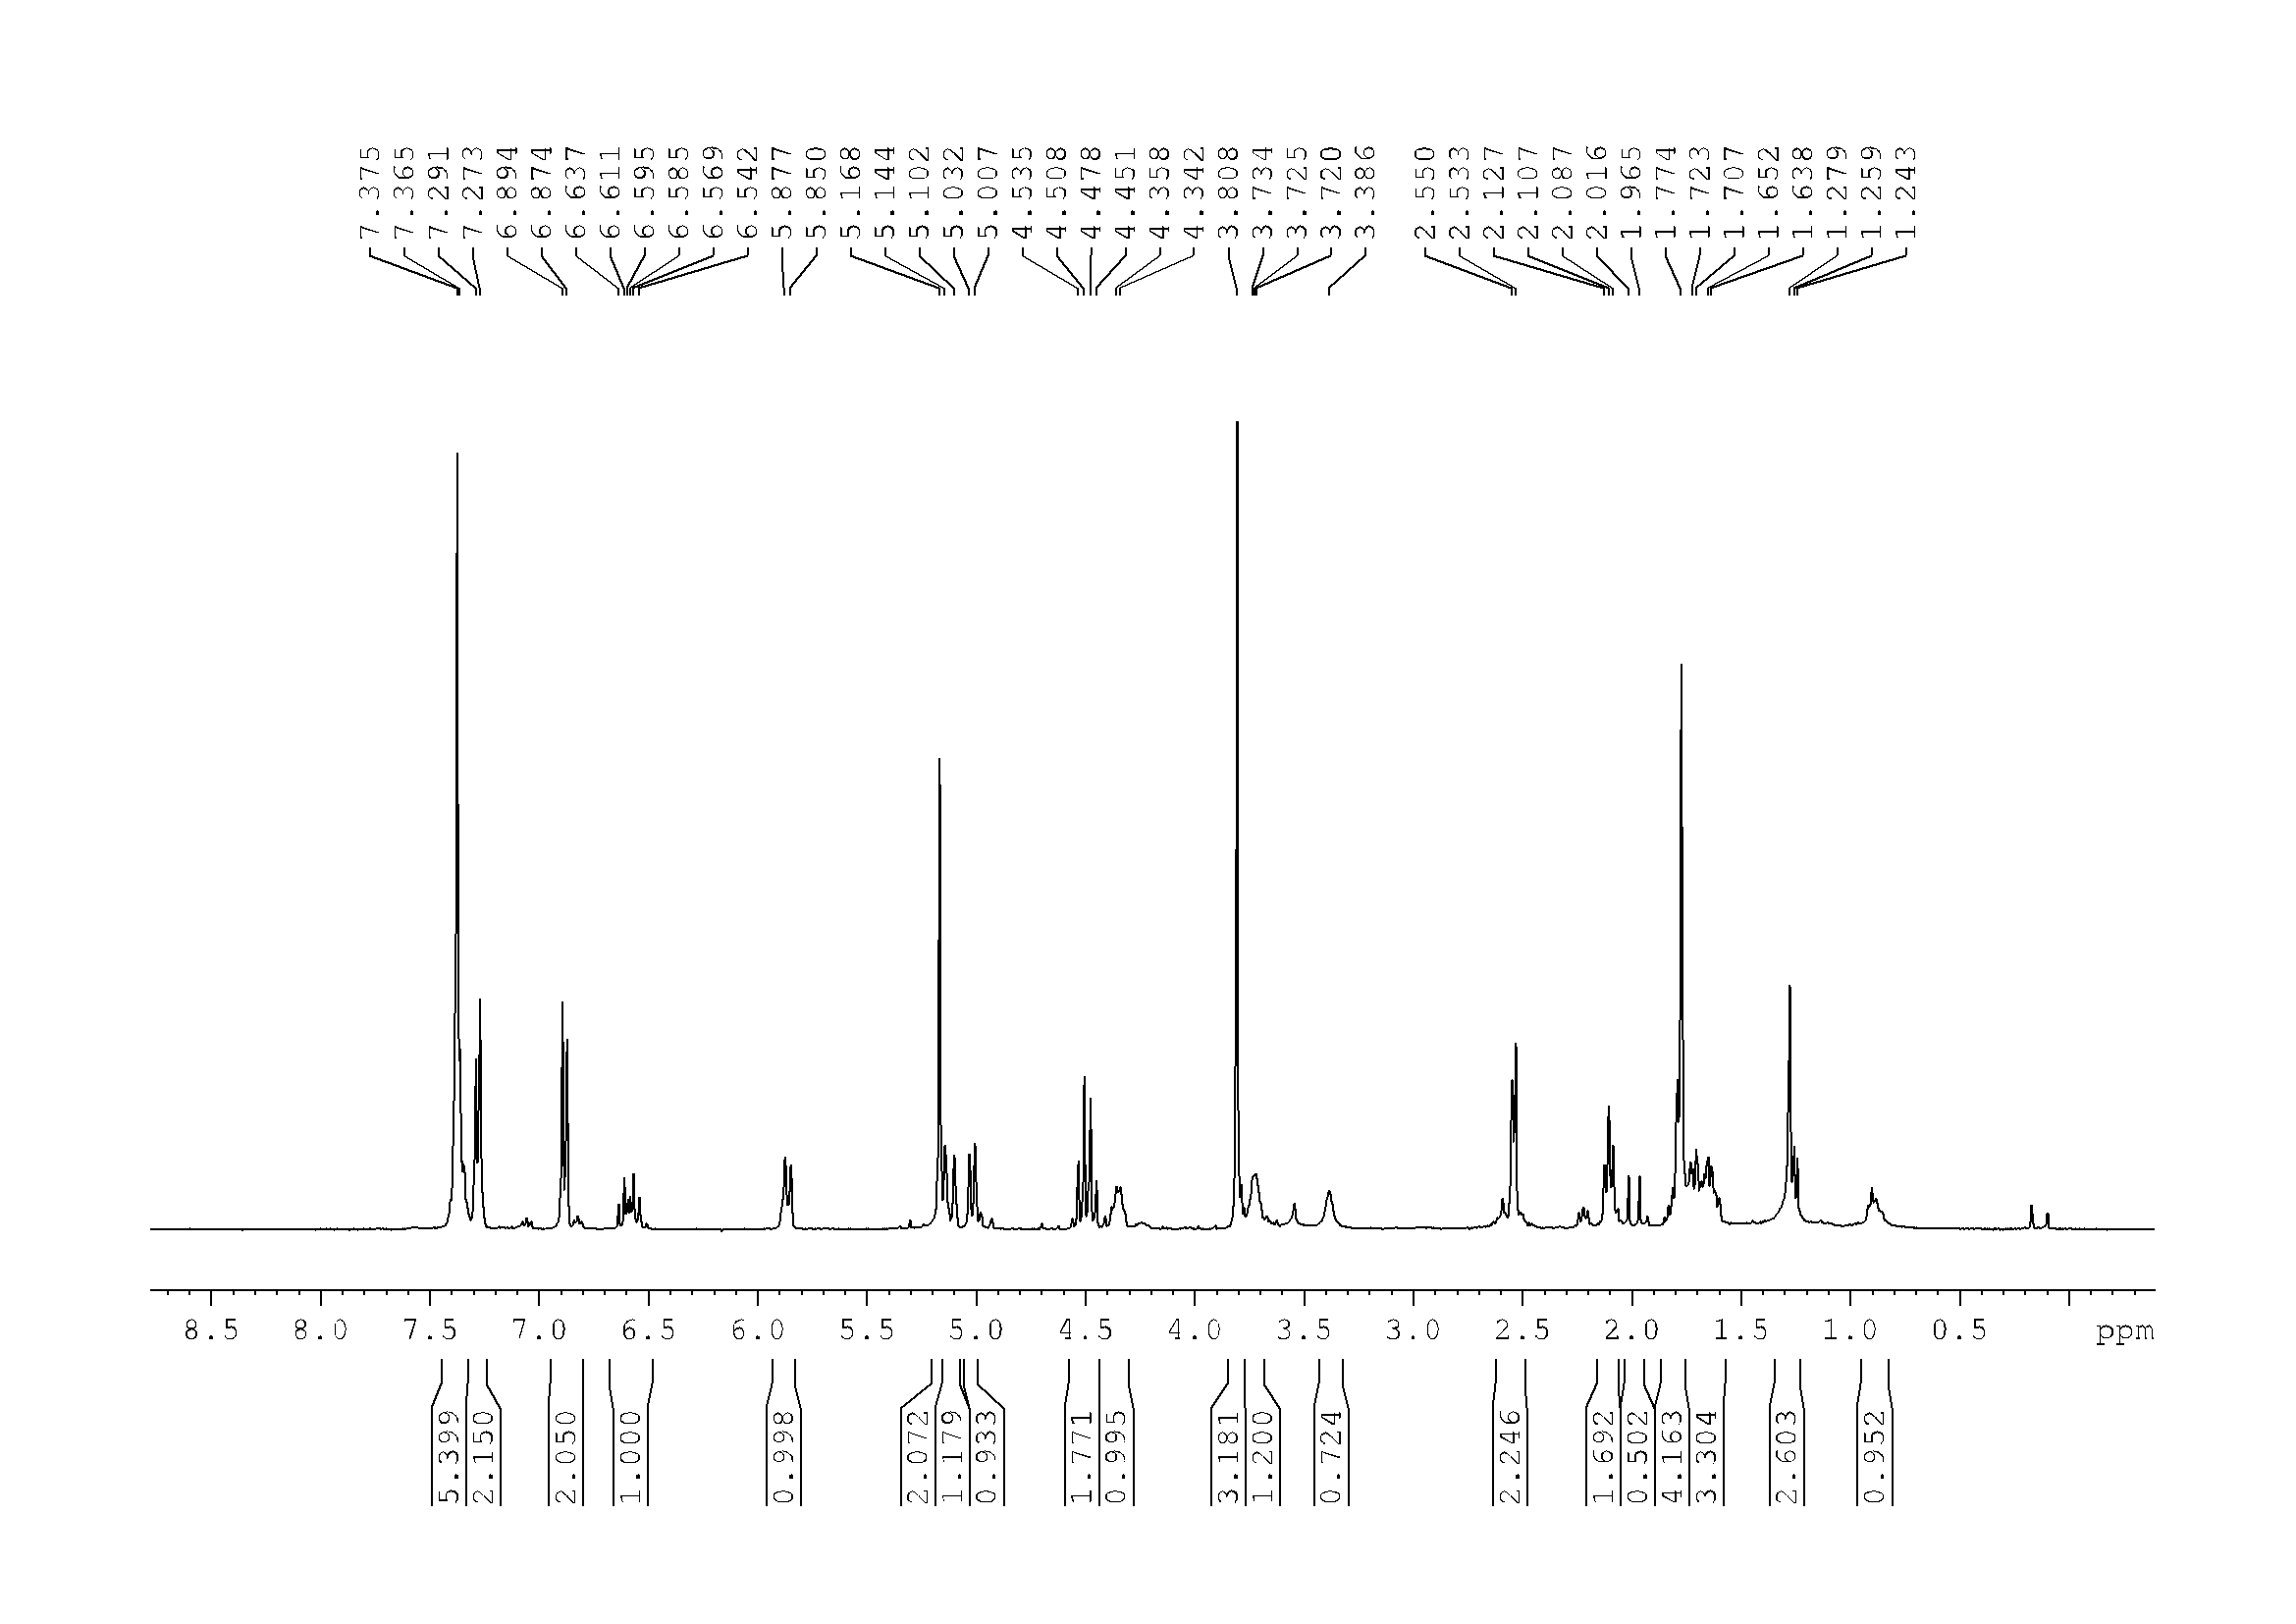


**Figure S7.** 1H NMR spectra ofCompound **1**.


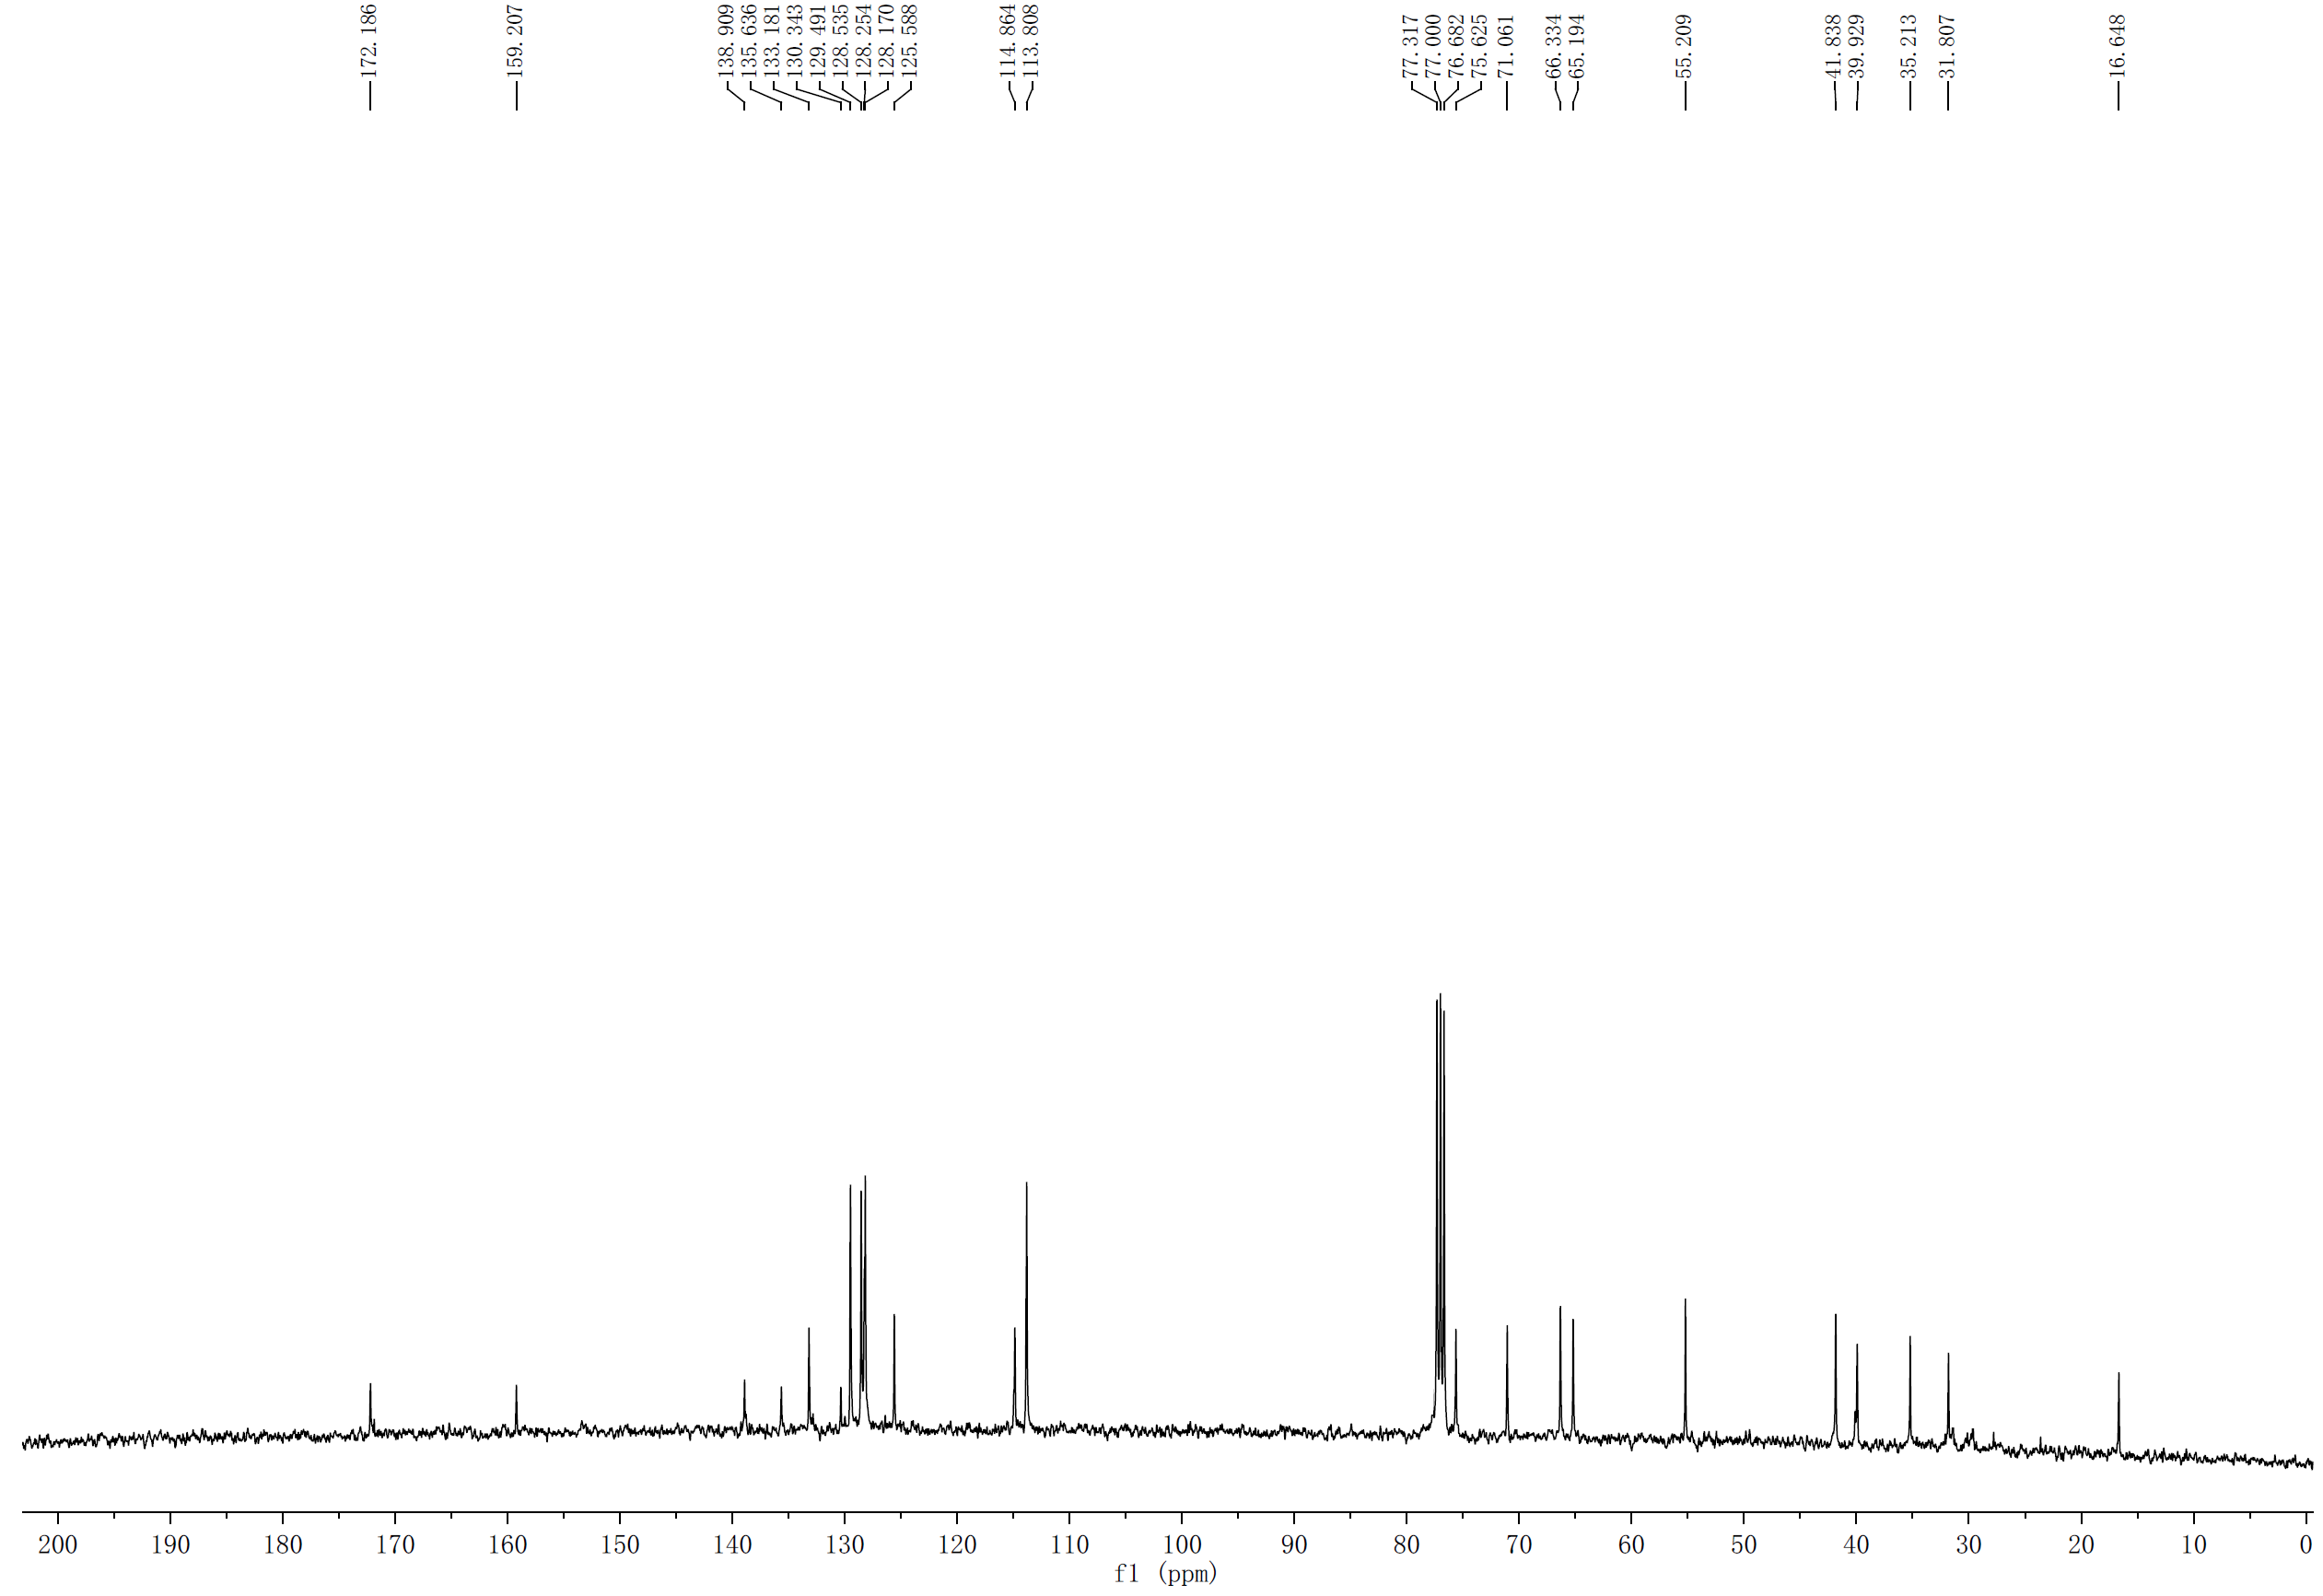


**Figure S8.** 13C NMR spectra ofCompound **1**.


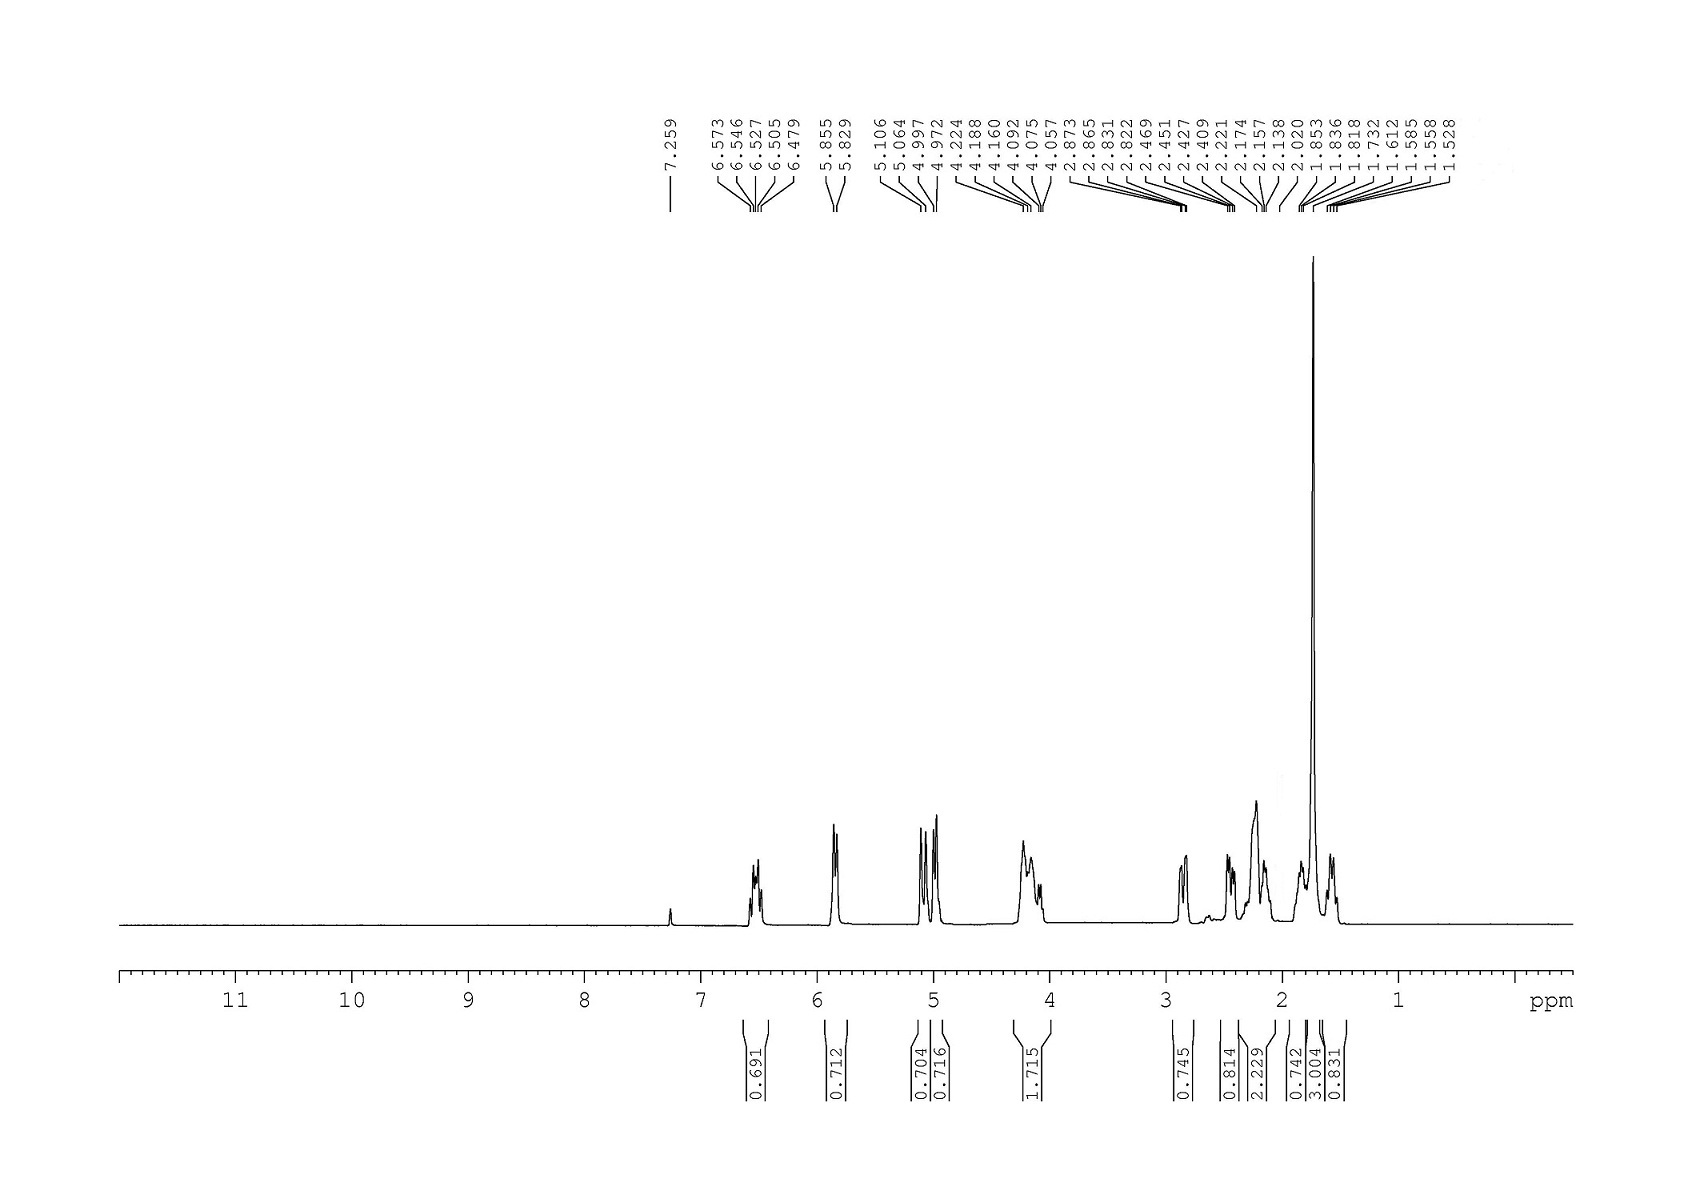


**Figure S9.** 1H NMR spectra ofieodomycin B.


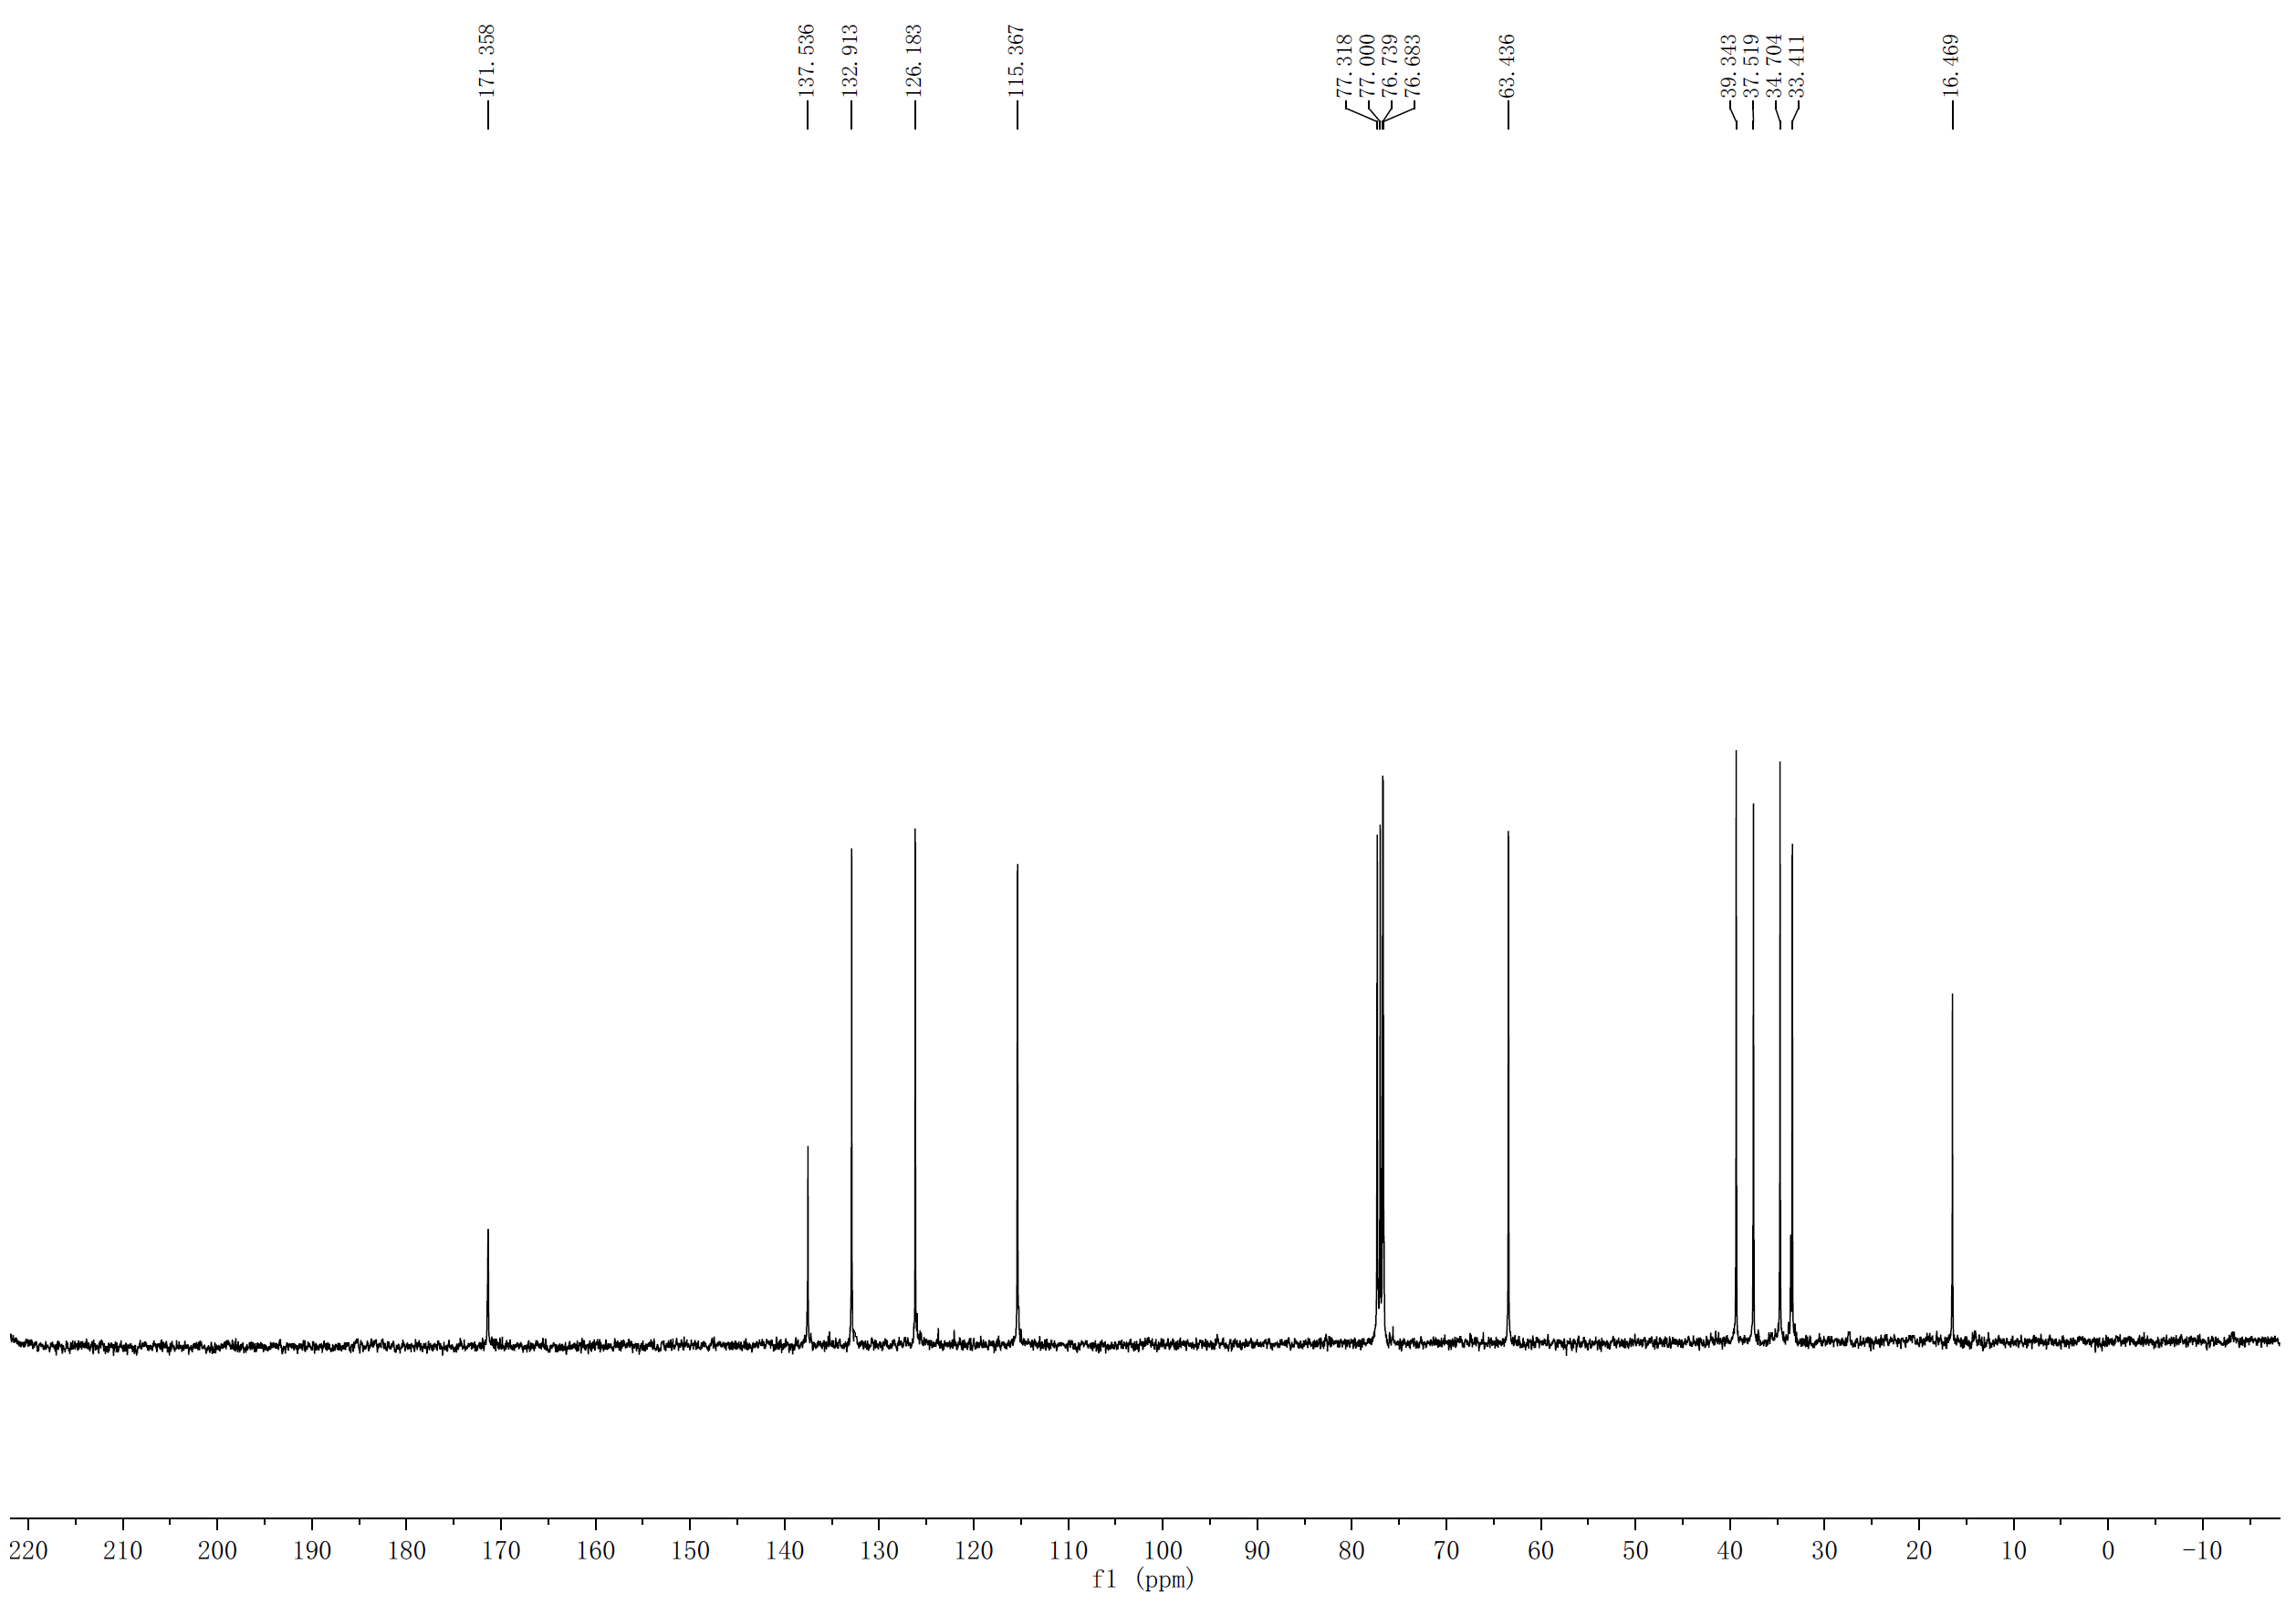


**Figure S10.** 13C NMR spectra ofieodomycin B.


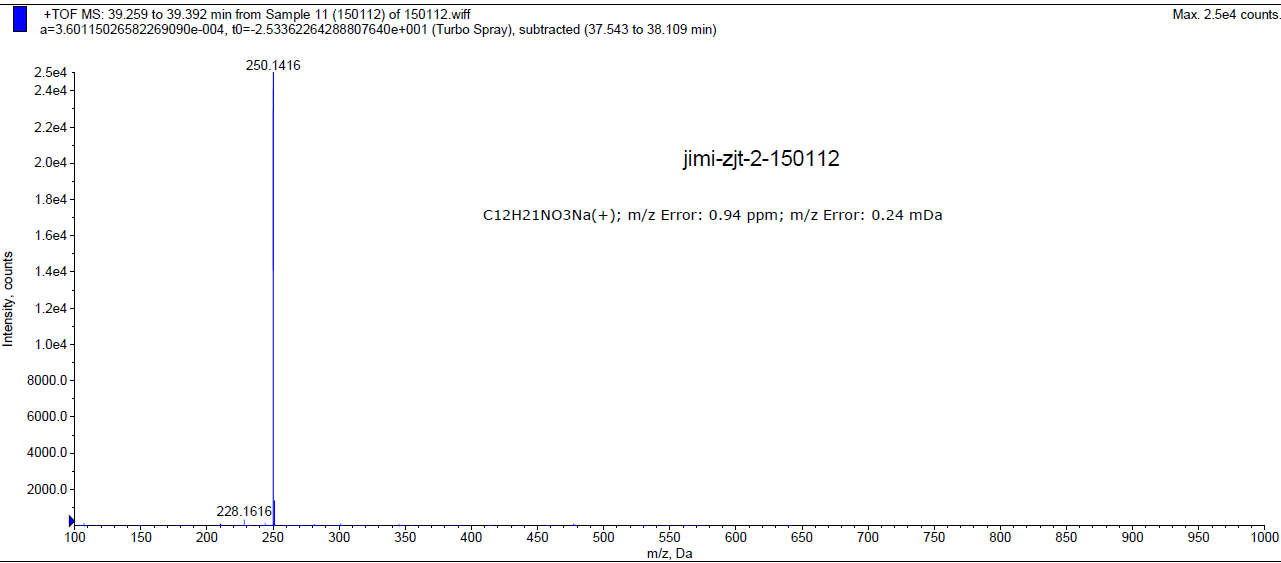


**Figure S11.** MS spectra ofCompound **11**: HRMS (ESI): *m*/*z* calcd. for C12H21NO3Na [M + Na]+  250.1414, found 250.1416.


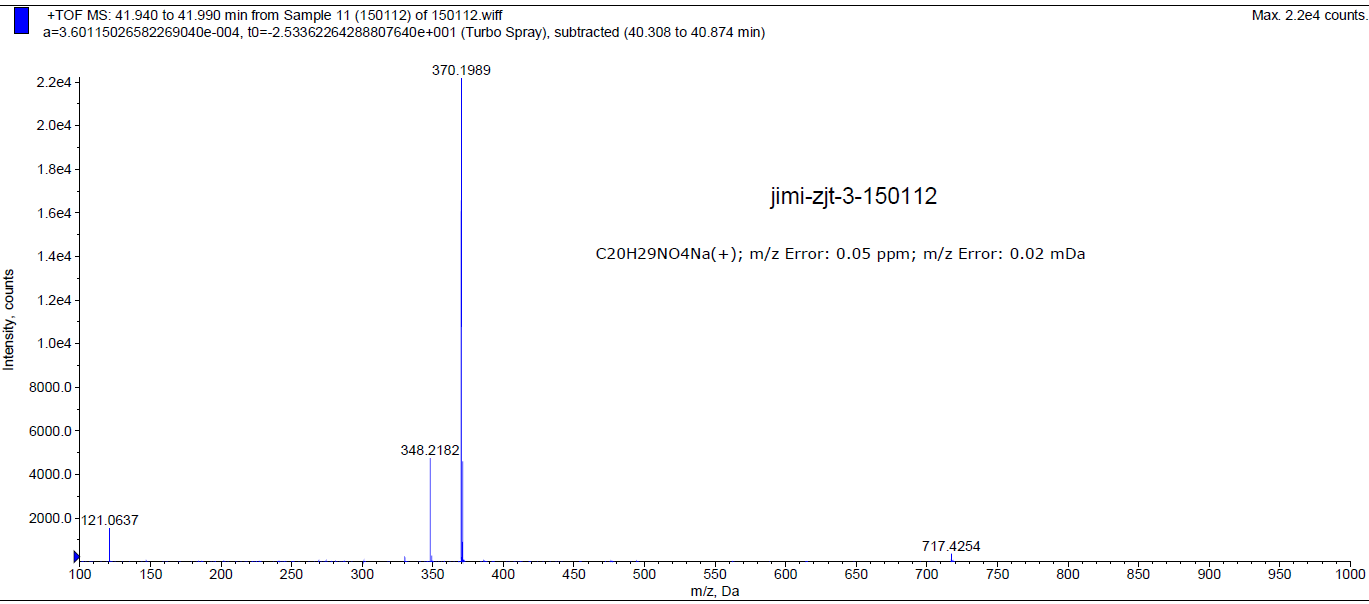


**Figure S12.** MS spectra of Compound **12**: HRMS (ESI): *m*/*z* calcd. for C20H29NO4Na [M + Na]+ 370.1989, found 370.1989.


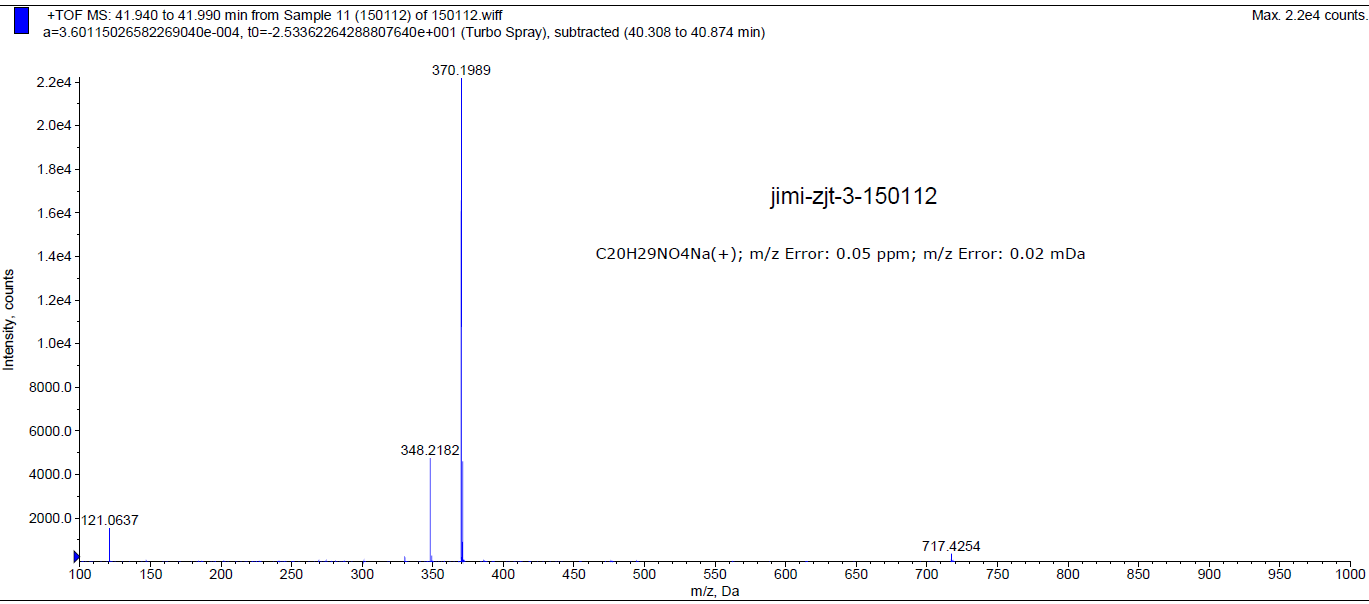


**Figure S13.** MS spectra ofCompound **1**: HRMS (ESI): *m*/*z* calcd. for C27H34NO5Na [M + Na]+ 461.2298, found 461.2302.


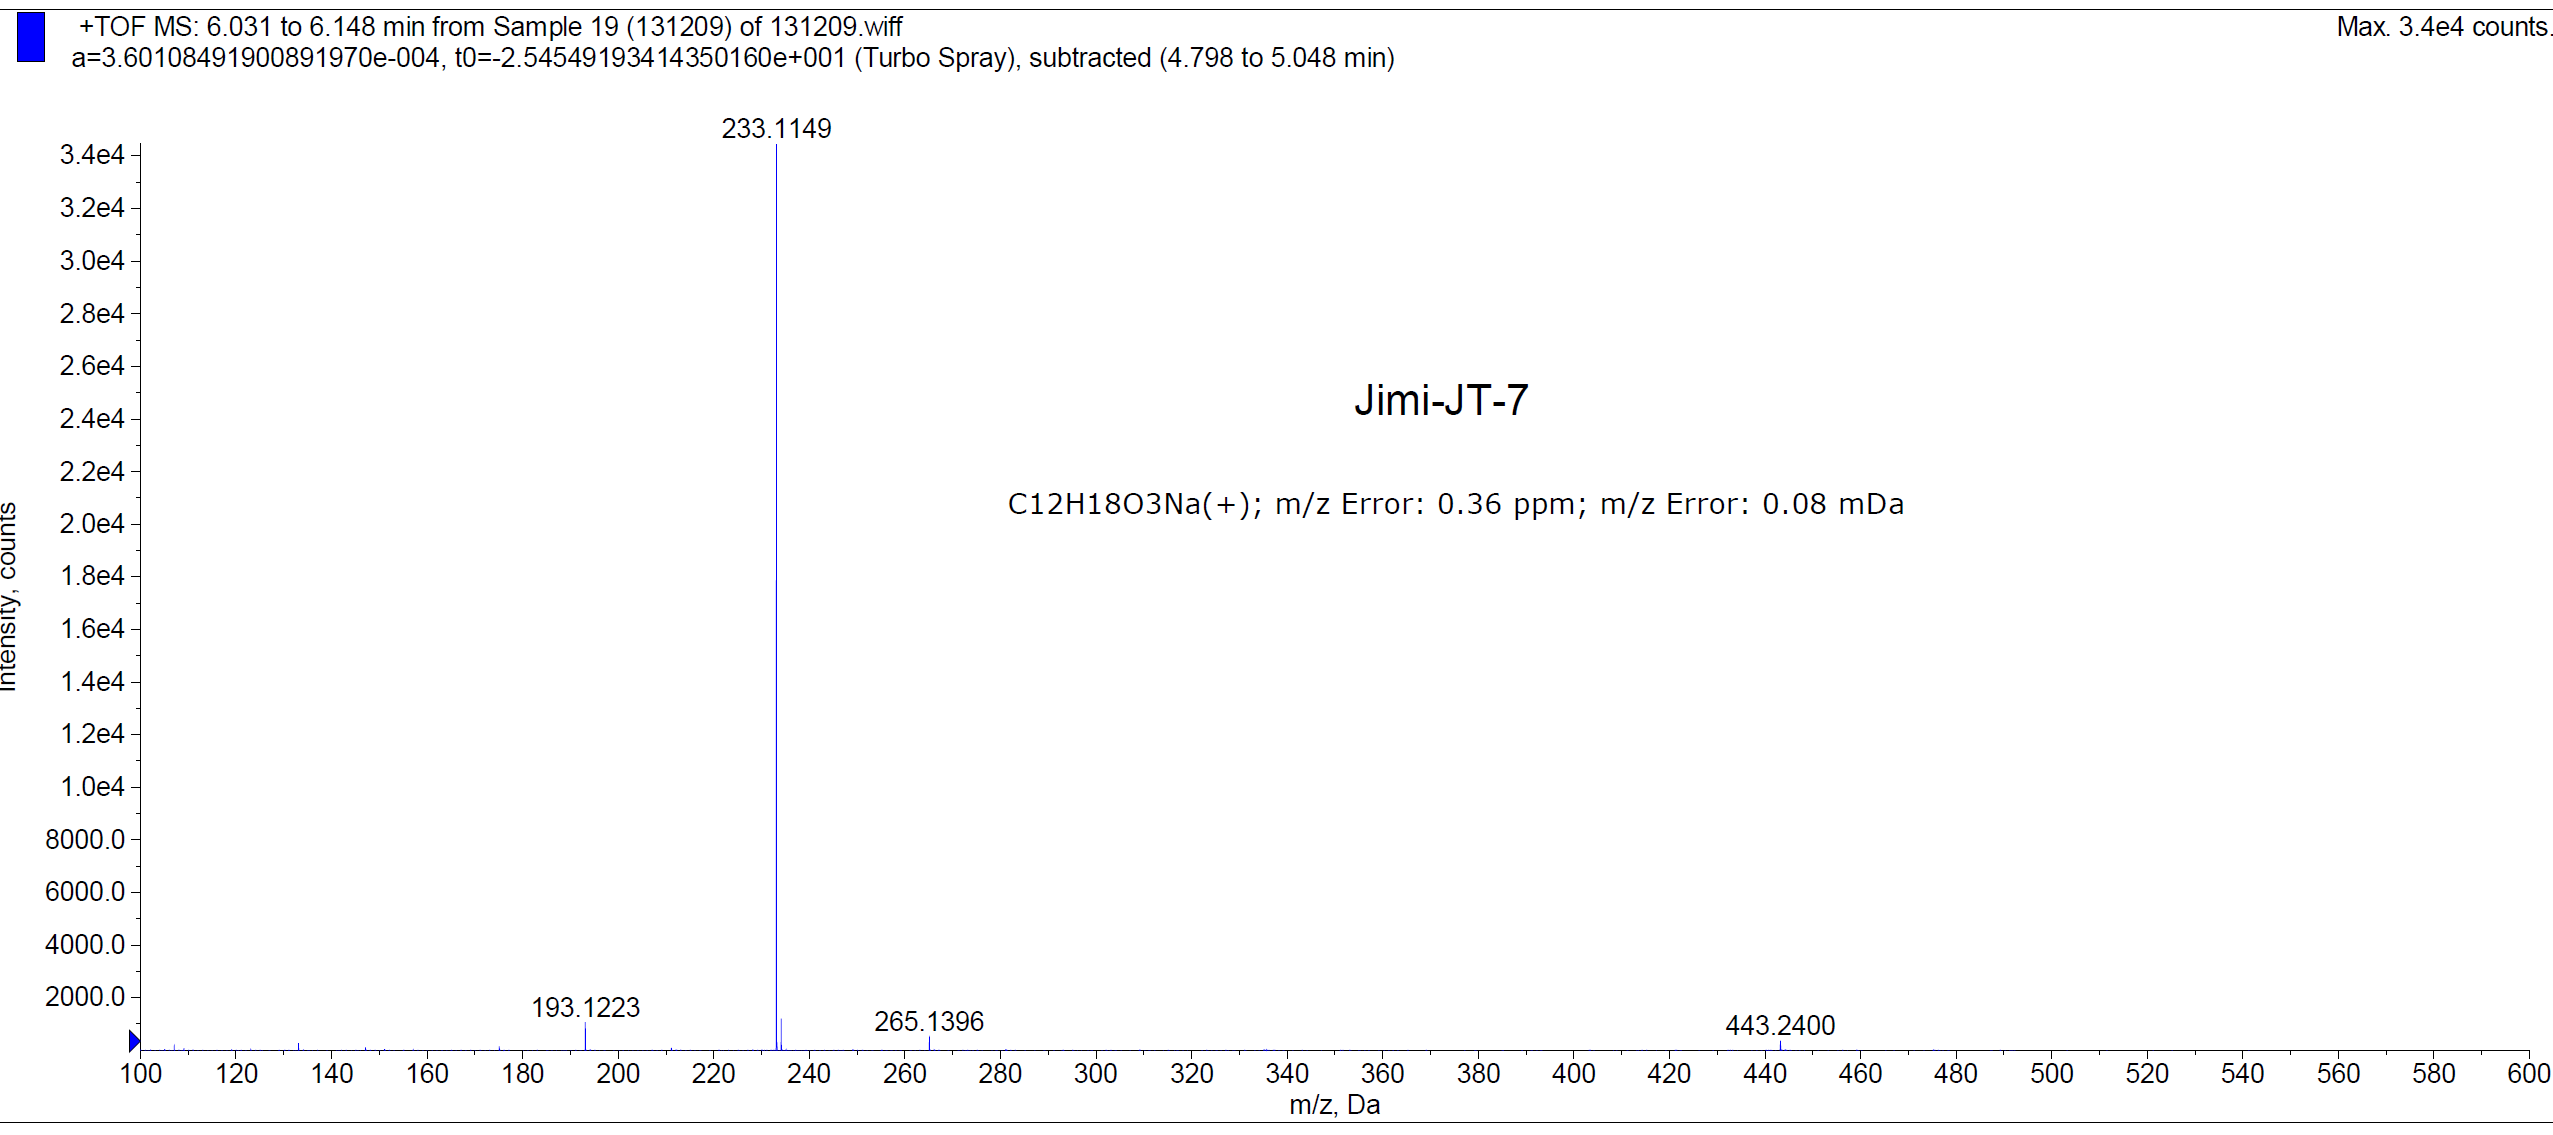


**Figure S14.** MS spectra ofieodomycin B: HRMS (ESI): *m*/*z* calcd. for C12H18O3Na [M + Na]+ 233.1148, found 233.1149.
